# 1 Inferring the landscape of 2 recombination using recurrent 3 neural networks

4 Jeffrey R. Adrion<sup>1,†</sup>, Jared G. Galloway<sup>1,†</sup>, Andrew D. Kern<sup>1</sup>

\*For correspondence:  
[jadrion@uoregon.edu](mailto:jadrion@uoregon.edu)

5 <sup>1</sup>Institute of Ecology and Evolution, University of Oregon

†These authors contributed equally  
to this work

7 **Abstract** Accurately inferring the genome-wide landscape of recombination rates in natural  
8 populations is a central aim in genomics, as patterns of linkage influence everything from genetic  
9 mapping to understanding evolutionary history. Here we describe ReLERNN, a deep learning  
10 method for estimating a genome-wide recombination map that is accurate even with small  
11 numbers of pooled or individually sequenced genomes. Rather than use summaries of linkage  
12 disequilibrium as its input, ReLERNN takes columns from a genotype alignment, which are then  
13 modeled as a sequence across the genome using a recurrent neural network. We demonstrate that  
14 ReLERNN improves accuracy and reduces bias relative to existing methods and maintains high  
15 accuracy in the face of demographic model misspecification, missing genotype calls, and genome  
16 inaccessibility. We apply ReLERNN to natural populations of African *Drosophila melanogaster* and  
17 show that genome-wide recombination landscapes, while largely correlated among populations,  
18 exhibit important population-specific differences. Lastly, we connect the inferred patterns of  
19 recombination with the frequencies of major inversions segregating in natural *Drosophila*  
20 populations.

## 22 Introduction

23 Recombination plays an essential role in the meiotic production of gametes in most sexual species,  
24 and is often required for proper segregation (*Nicklas, 1974*) and pairing of homologous chromo-  
25 somes (reviewed in *Zickler and Kleckner, 2015*). During prophase of meiosis, recombination is  
26 initiated by the formation of double-strand breaks (DSBs) across a wide array of organisms (*Lichten,*  
27 *2001*). A subset of these DSBs will be repaired as crossover events, leading to reciprocal exchange  
28 between homologs. Those that are not resolved as crossovers are repaired through a number  
29 of mechanisms included noncrossover gene conversions and non-homologous end joining (*Do*  
30 *et al., 2014*). Recombination not only plays a central role in meiosis, but so too does it have wide  
31 ranging effects on both evolutionary and population genomics (*Lewontin and Kojima, 1960; Hill*  
32 *and Robertson, 1966; Ohta and Kimura, 1969, 1970; Smith and Haigh, 1974*).

33 Indeed, the population recombination rate  $\rho = 4Nr$  is a central parameter in population and  
34 statistical genetics (reviewed in *Hahn, 2018*), as at equilibrium we expect  $\rho$  to be proportional to the  
35 scale of of linkage disequilibrium (LD) in a given region of the genome (*Ohta and Kimura, 1969*). In  
36 regions of the genome where  $\rho$  is relatively small we expect increased levels of LD, and conversely  
37 in genomic compartments with high  $\rho$  we expect little LD. Deviations from our expected levels of LD  
38 given the local recombination rate can be illustrative of the influence of other evolutionary forces  
39 such as selection or migration. For example, selective sweeps are expected to dramatically elevate  
40 LD near the target of selection (e.g. *Kim and Nielsen, 2004; O'Reilly et al., 2008; Parsch et al., 2001*).

41 Structural variation itself is expected to modulate the landscape of recombination—herein

42 the map of per-base recombination rates,  $r$ , to genomic positions along the chromosomes—as  
43 both crossovers and non-crossovers are predicated on the alignment of homologous sequences,  
44 and structural rearrangements may directly impact those alignments. Chromosomal inversions,  
45 long-known to suppress crossing over along a chromosome (e.g. *Sturtevant, 1921*), are one of the  
46 best studied examples of such structural variation. Inversion polymorphisms have been implicated  
47 in diverse evolutionary phenomena including local adaptation (*Dobzhansky, 1937; Kirkpatrick and*  
48 *Barton, 2006; Ayala et al., 2013*), reproductive isolation (*White, 1977; Ayala et al., 2013; Noor et al.,*  
49 *2001; Rieseberg, 2001*), and the maintenance of meiotic drive complexes (reviewed in *Jaenike, 2001*).  
50 As suppressors of recombination, we expect *a priori* that segregating inversions should show distinct  
51 histories of recombination in comparison to standard karyotype chromosomes.

52 While recombination plays a central role in meiosis and reproduction, the frequency and dis-  
53 tribution of crossovers along the chromosomes are themselves phenotypes that can evolve. Not  
54 only is there a long tradition of work demonstrating the conditions under which rates of recombina-  
55 tion might change (*Fisher, 1930; Muller, 1932; Charlesworth, 1976; Barton, 1995; Otto and Barton,*  
56 *1997*), but increasingly there is good empirical evidence that such changes do indeed occur in  
57 nature (reviewed in *Ritz et al., 2017*). Importantly, recombination rate variation exists between  
58 species, between populations, and between sexes of the same species (males generally having  
59 shorter maps than females) (*Hinch et al., 2011; Kong et al., 2010; Singh et al., 2013; Winckler et al.,*  
60 *2005*). Yet while there is abundant variation in the rate of recombination within and between taxa,  
61 methods for accurately measuring this variation have historically involved painstaking experiments  
62 or large pedigrees. Thus genetics, as a field, seeks ever-improving tools for directly estimating  
63 recombination rates from sequence data, without relying on pedigree genotyping or other ancillary  
64 information.

65 Accordingly, there is a rich history of estimating  $\rho$  in population genetics, including efforts  
66 to obtain minimum bounds on the number of recombination events (*Hudson and Kaplan, 1985;*  
67 *Myers and Griffiths, 2003; Wiuf, 2002*), methods of moments estimators (*Hudson, 1987; Wakeley,*  
68 *1997*), composite likelihood estimators (*Chan et al., 2012; Hudson, 2002; McVean et al., 2002*), and  
69 summary likelihood estimators (*Li and Stephens, 2003; Wall, 2000*). Recently, supervised machine  
70 learning methods for estimating  $\rho$  have entered the fray (*Gao et al., 2016; Lin et al., 2013*), and  
71 have proven to be competitive in accuracy with state-of-the-art composite likelihood methods such  
72 as LDhat (*McVean et al., 2002*) or LDhelmet (*Chan et al., 2012*), often with far less computing effort.  
73 These methods, taken *en masse* have uncovered interesting biology, for instance the characterization  
74 of recombination hotspots (*Myers et al., 2005*), and are well suited for large samples of high quality  
75 genome or genotype data.

76 To this end, we sought to develop a novel method for inferring rates of recombination directly  
77 from a sequence alignment through the use of deep learning. In recent years deep artificial neural  
78 networks (ANNs) have produced remarkable performance gains in computer vision (*Krizhevsky*  
79 *et al., 2012; Szegedy et al., 2015*), speech recognition (*Hinton et al., 2012*), natural language pro-  
80 cessing (*Sutskever et al., 2014*), and data preprocessing tasks such as denoising (*Vincent et al.,*  
81 *2008*). Perhaps most illustrative of the potential of deep learning is the remarkable success of con-  
82 volutional neural networks (CNNs; *Lecun et al., 1998*) on problems in image analysis. For example,  
83 prior to the introduction of CNNs to the annual ImageNet Large Scale Visual Recognition Challenge  
84 (*Krizhevsky et al., 2012*), no method had achieved an error rate of less than 25% on the ImageNet  
85 data set. In the years that followed, CNNs succeeded in reducing this error rate below 5%, exceeding  
86 human accuracy on the same tasks (*Russakovsky et al., 2015*).

87 In this study we focus our efforts on recurrent neural networks (RNNs), a promising network  
88 architecture for population genomics, which has proven adept for analyzing sequential data of  
89 arbitrary lengths (*Graves et al., 2013*). Unlike other machine learning methods, deep learning  
90 approaches do not require a predefined feature vector. When fed labeled training data (e.g. a set  
91 of genotypes simulated under a known recombination rate), these methods algorithmically create  
92 their own set of informative statistics that prove most effective for solving the specified problem.

93 By training deep learning networks directly on sequence alignments, we allow the neural network  
94 to automatically extract informative features from the data without human supervision. Learning  
95 directly from a sequence alignment for population genetic inference has recently been shown to  
96 be possible using CNNs (*Chan et al., 2018; Flagel et al., 2018*), and as we show below, is also true  
97 for RNNs. Moreover, supervised deep learning methods, such as RNNs, can be trained directly on  
98 the types of missing data that often beset researchers investigating non-model organisms using  
99 traditional tools.

100 Here we introduce **Recombination Landscape Estimation using Recurrent Neural Networks**, an  
101 RNN-based method for estimating the genomic map of recombination rates directly from a genotype  
102 alignment. We found that ReLERNN is both highly accurate and out-performs competing methods at  
103 small sample sizes. We also show that ReLERNN retains its high accuracy in the face of demographic  
104 model misspecification, missing genotypes, and genome inaccessibility. Further, we present an  
105 extension to ReLERNN that takes as input allele frequencies estimated by pooled sequencing  
106 (Pool-seq), making ReLERNN the first software package to directly infer rates of recombination  
107 in Pool-seq data. These results suggest that ReLERNN has the potential to fill a much-needed  
108 role in the analysis of low-quality or sparse genomic data. We then apply ReLERNN to population  
109 genomic data from African samples of *Drosophila melanogaster*. We demonstrate that the landscape  
110 of recombination is largely conserved in this species, yet individual regions of the genome show  
111 marked population-specific differences. Finally, we found that chromosomal inversion frequencies  
112 directly impact the inferred rate of recombination, and we demonstrate that the role of inversions  
113 in suppressing recombination extends far beyond the inversion breakpoints themselves.

## 114 Results

### 115 **ReLERNN: an accurate method for estimating the genome-wide recombination 116 landscape**

117 We developed ReLERNN, a new deep learning method for accurately predicting genome-wide  
118 per-base recombination rates from as few as four chromosomes. Briefly, ReLERNN provides an end-  
119 to-end inferential pipeline for estimating a recombination map from a population sample: it takes as  
120 input either a Variant Call Format (VCF) file or, in the case of ReLERNN for Pool-seq data, a vector of  
121 allele frequencies and genomic coordinates. ReLERNN then uses the coalescent simulation program,  
122 msprime (*Kelleher et al., 2016*), to simulate training, validation, and test data sets under either  
123 constant population size or an inferred population size history. Importantly, these simulations are  
124 parameterized to match the distribution of Watterson's estimator,  $\theta_w$ , calculated from the empirical  
125 samples. ReLERNN trains a specific type of RNN, known as a Gated Recurrent Unit (GRU; *Cho et al.,*  
126 *2014*), to predict the per-base recombination rate for these simulations, using only the raw genotype  
127 matrix and a vector of genomic coordinates for each simulation example (*Figure 1, Figure S1,*  
128 *Figure S2*). It then uses this trained network to estimate genome-wide per-base recombination  
129 rates for empirical samples using a sliding-window approach. ReLERNN can optionally estimate  
130 95% confidence intervals around each prediction using a parametric bootstrapping approach, and  
131 it uses the predictions generated while bootstrapping to correct for inherent biases in the training  
132 process (see Materials and Methods; *Figure S3*).

133 A key feature of ReLERNN's network architecture is the bidirectional GRU layer (*Figure 1, Fig-  
134 ure S1*), which allows us to model genomic sequence alignments as a time series. While vanilla  
135 (feed-forward) networks use as input a full block of data for each example, recurrent layers break  
136 each genotype alignment into time steps corresponding to discrete genomic coordinates, and  
137 iterate over the time steps sequentially. At each time step, the gated recurrent units modulate  
138 the flow of information, using reset and update gates that control how the activation is updated  
139 (*Cho et al., 2014; Chung et al., 2014*). This process allows the gradient descent algorithm, known as  
140 backpropagation through time, to share parameters across time steps, as well as make inferences  
141 based on the ordering of SNPs—i.e. to have a spatial memory of allelic associations along the

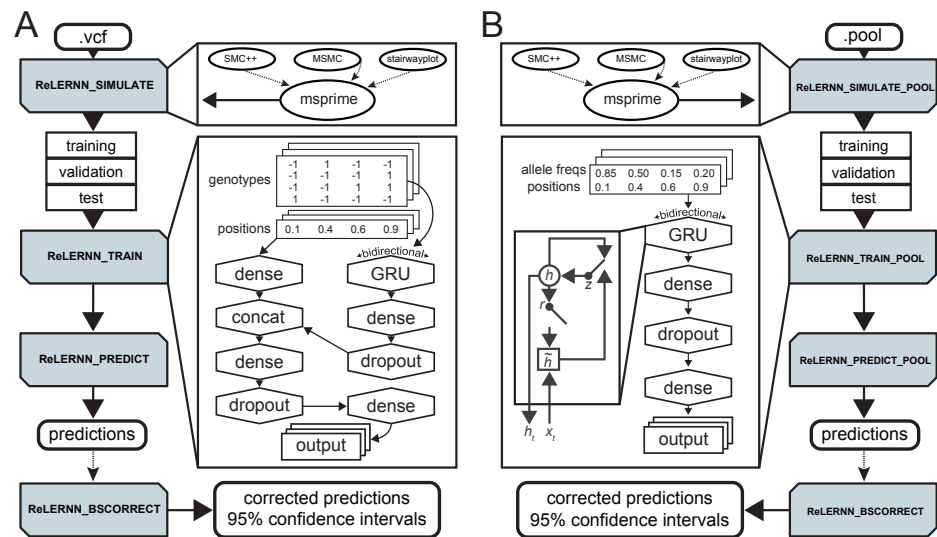

**Figure 1** A cartoon depicting a typical workflow using ReLERNN's four modules (shaded boxes) for **(A)** individually sequenced genomes or **(B)** pooled sequences. ReLERNN can optionally (dotted lines) utilize output from stairwayplot, SMC++, MSMC to simulate under a demographic history with msprime. Training inlays show the network architectures used, with the GRU inlay in **(B)** depicting the gated connections within each hidden unit. Here  $r$ ,  $z$ ,  $h_t$ , and  $\tilde{h}_t$  are the reset gate, update gate, activation, and candidate activation, respectively (Cho et al., 2014). The genotype matrix encodes alleles as reference (-1), alternative (1), or padded/missing data (0; not shown). Variant positions are encoded along the real number line (0-1).

142 chromosome. The bidirectional attribute of the GRU layer simply means that each example is  
 143 duplicated and reversed, so the sequence data are analyzed from both directions and then merged  
 144 by concatenation. We present a generalized GRU for analyzing genomic sequence data, along with  
 145 a more detailed look at the network architecture parameters used by ReLERNN in **Figure S1**.

### 146 Performance on simulated chromosomes

147 To assess our method we performed coalescent simulations using msprime (Kelleher et al., 2016),  
 148 generating whole chromosome samples using a fine scale genetic map estimated from crosses  
 149 of *D. melanogaster* (Comeron et al., 2012). We then used ReLERNN to estimate the landscape of  
 150 recombination for these simulated examples. ReLERNN is able to predict the landscape of per-base  
 151 recombination rates to a high degree of accuracy across a wide range of realistic parameter values,  
 152 assumptions, and sample sizes ( $R^2 \geq 0.82$ ; Mean absolute error ( $MAE$ )  $\leq 1.28 \times 10^{-8}$ ). Importantly,  
 153 the accuracy of ReLERNN is only modestly diminished when comparing predictions based on 20  
 154 samples ( $R^2 = 0.93$ ;  $MAE = 3.72 \times 10^{-9}$ ; **Figure 2A**) to those based on four samples ( $R^2 = 0.82$ ;  
 155  $MAE = 6.66 \times 10^{-9}$ ; **Figure S4**). We also show that ReLERNN performs equally well on phased  
 156 and unphased genotypes ( $W = 68.5$ ;  $P = 0.17$ ; Mann-Whitney  $U$  test; **Figure S5**), suggesting that  
 157 any effect of computational phasing error might be mitigated by treating the inputs as unphased  
 158 variants.

159 Because ReLERNN performed exceedingly well on unphased genotypes, we speculated that  
 160 it might be able to glean crucial information about recombination rates from a vector of allele  
 161 frequencies alone. Therefore we set out to extend ReLERNN to work with Pool-seq data, where  
 162 the only inputs are a vector of allele frequencies and their corresponding genomic coordinates.  
 163 Surprisingly, ReLERNN exhibits modest accuracy on simulated Pool-seq data, despite simulated  
 164 sample and read depths as low as  $n = 50$  and  $coverage = 50X$  ( $R^2 = 0.54$ ;  $MAE = 1.59 \times 10^{-8}$ ; **Figure S6**).

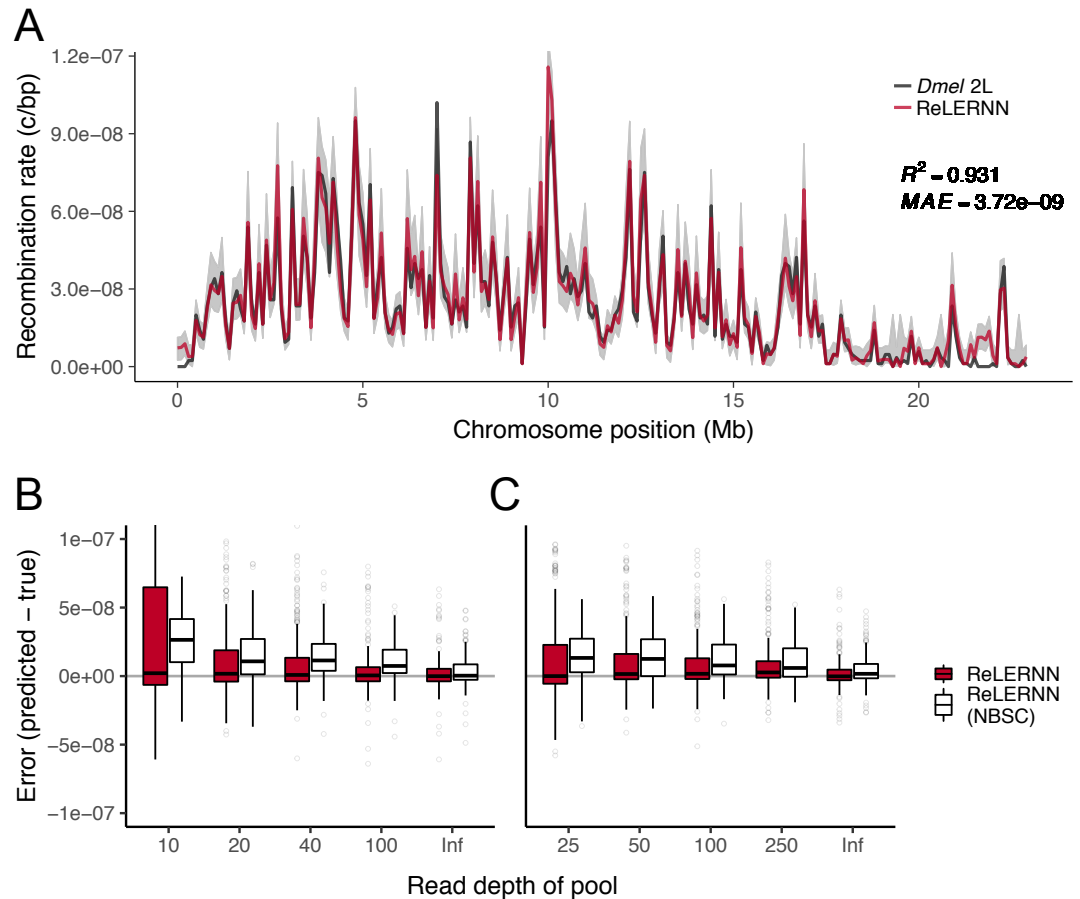

**Figure 2 (A)** Recombination rate predictions for a simulated *Drosophila* chromosome (black line) using ReLERNN for individually sequenced genomes (red line). The recombination landscape was simulated for  $n = 20$  chromosomes under mutation-drift equilibrium using msprime (Kelleher *et al.*, 2016), with per-base crossover rates taken from *D. melanogaster* chromosome 2L (Comeron *et al.*, 2012). Gray ribbons represent 95% confidence intervals.  $R^2$  is reported for the general linear model of predicted rates on true rates and mean absolute error was calculated across all 100 kb windows. **(B)** Distribution of raw error ( $r_{predicted} - r_{true}$ ) using ReLERNN for Pool-seq data. Pools simulated from the same recombination landscape as above, with  $n = 20$  and **(C)**  $n = 50$  chromosomes across a range of simulated read depths (0.5X to 5X; *Inf* represents infinite simulated sequencing depth). Both the bootstrap-corrected predictions (red) and the non-bootstrap-corrected (NBSC; white) predictions are shown.

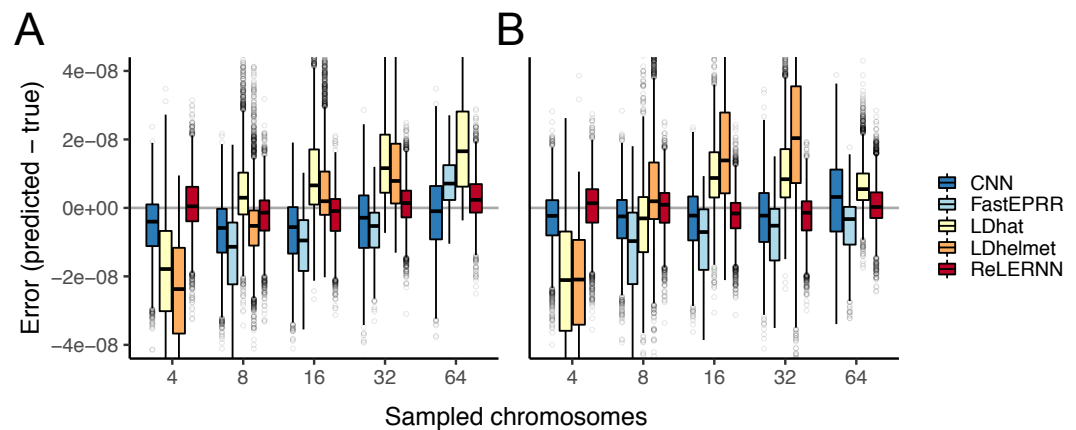

**Figure 3 (A)** Distribution of raw error ( $r_{predicted} - r_{true}$ ) for each method across 5000 simulated chromosomes (1000 for FastEPRR). Independent simulations were run under a model of population size expansion or **(B)** demographic equilibrium. Sampled chromosomes indicate the number of independent sequences that were sampled from each msprime (Kelleher et al., 2016) coalescent simulation. LDhelmet was not able to be used with  $n = 64$  chromosomes, and FastEPRR was not able to be used with  $n = 4$ .

165 Increasing the read depth to a nominal 5X the sample depth (e.g.  $n = 50$  and *coverage* = 250X)  
 166 produced substantially greater accuracy ( $R^2 = 0.69$ ;  $MAE = 1.20 \times 10^{-8}$ ; **Figure S7**). As a general  
 167 trend, we show that prediction error is reduced by increasing the number of chromosomes sampled  
 168 in the pool (i.e. increasing allele frequency resolution) and by increasing the depth of sequencing  
 169 (i.e. reducing sampling error) (**Figure 2B**). While there currently exists software for estimating LD  
 170 in Pool-seq data (Feder et al., 2012), to our knowledge ReLERNN is the first software to directly  
 171 estimate rates of recombination using these data.

172 While ReLERNN retains accuracy at small sample sizes, it exhibits somewhat greater sensitivity  
 173 to both the assumed genome-wide average mutation rate,  $\bar{\mu}$ , and the assumed maximum value  
 174 for recombination,  $\rho_{max}$ . To assess the degree of sensitivity to these assumptions, we ran ReLERNN  
 175 on simulated chromosomes assuming  $\bar{\mu}$  was both 50% greater and 50% less than the simulated  
 176 mutation rate,  $\mu_{true}$ . In both scenarios, ReLERNN predicts crossover rates that are highly correlated  
 177 with the true rates ( $R^2 > 0.91$ ). However, in both scenarios  $MAE$  is inflated but still modest, and  
 178 the absolute rates of recombination are underpredicted ( $R^2 = 0.91$ ;  $MAE = 1.23 \times 10^{-8}$ ; **Figure S8**)  
 179 and slightly overpredicted ( $R^2 = 0.94$ ;  $MAE = 1.28 \times 10^{-8}$ ; **Figure S9**) when assuming  $\bar{\mu}$  is less than or  
 180 greater than  $\mu_{true}$ , respectively. Moreover, underestimating  $\rho_{max}$  causes ReLERNN to underpredict  
 181 rates of recombination roughly proportional to the the magnitude of the underestimate (**Figure S10**,  
 182 **Figure S11**), while overestimating  $\rho_{max}$  causes only a minor loss in accuracy ( $R^2 = 0.90$ ;  $MAE = 4.07 \times$   
 183  $10^{-9}$ ; **Figure S12**). Together these results suggest that ReLERNN is in fact learning information about  
 184 the ratio of crossovers to mutations, and while ReLERNN is highly robust to errant assumptions when  
 185 predicting relative recombination rates within a genome, caution must be taken when comparing  
 186 absolute rates between organisms with large differences in per-base mutation rate estimates or for  
 187 species. One additional limitation to ReLERNN it's inability to fully resolve narrow recombination  
 188 rate hot spots (herein defined as  $\leq 10$  kb genomic regions with  $r \geq 50X$  the genome-wide average).  
 189 We simulated hot spots of different lengths [ $length \in \{2kb, 4kb, 6kb, 8kb, 10kb\}$ ,  $r_{background} = 2.5e^{-9}$ ,  
 190  $r_{hotspot} = 1.25e^{-7}$ ] and found that errors at hot spots were negatively correlated with hot spot length  
 191 (**Figure S13**), suggesting that signal for crossovers at hot spots is being swamped by the background  
 192 rate within the focal window, especially for very narrow hot spots relative to the focal window. This  
 193 limitation could be of particular importance when attempting to resolve hot spots in human data,

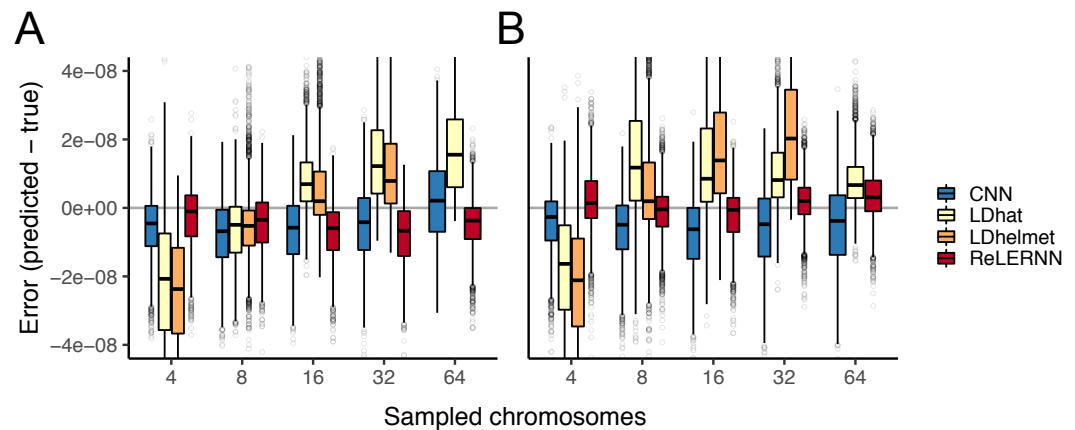

**Figure 4 (A)** Distribution of raw error ( $r_{predicted} - r_{true}$ ) for each method across 5000 simulated chromosomes after model misspecification. For the CNN and ReLERNN, predictions were made by training on equilibrium simulations while testing on sequences simulated under a model of population size expansion or **(B)** training on demographic simulations while testing on sequences simulated under equilibrium. For LDhat and LDhelmet, the lookup tables were generated using parameters values that were estimated from simulations where the model was misspecified in the same way as described for the CNN and ReLERNN above. Sampled chromosomes indicate the number of independent sequences that were sampled from each msprime (Kelleher *et al.*, 2016) coalescent simulation. LDhelmet was not able to be used with  $n = 64$  chromosomes and the demographic model could not be intentionally misspecified using FastEPRR.

194 where lengths are often between 1-2 kb (Jeffreys *et al.*, 2001; Jeffreys and May, 2004).

### 195 **ReLERNN compares favorably to competing methods, especially for small sample** 196 **sizes and under model misspecification**

197 To assess the accuracy of ReLERNN relative to existing methods, we took a comparative approach  
198 whereby we made predictions on the same set of simulated test chromosomes using methods  
199 that differ broadly in their approaches. Specifically, we chose to compare ReLERNN against two  
200 types of machine learning methods—a boosted regression method, FastEPRR (Gao *et al.*, 2016),  
201 and a convolutional neural network (CNN) recently described in Fligel *et al.* (2018)—and both  
202 LDhat (McVean *et al.*, 2002) and LDhelmet (Chan *et al.*, 2012), two widely cited approximate-  
203 likelihood methods. We independently simulated  $10^5$  chromosomes using msprime (Kelleher *et al.*,  
204 2016) [parameters:  $sample\_size \in \{4, 8, 16, 32, 64\}$ ,  $recombination\_rate = U(0.0, 6.25e^{-8})$ ,  $mutation\_rate =$   
205  $U(1.875e^{-8}, 3.125e^{-8})$ ,  $length = 3e^5$ ]. Half of these were simulated under demographic equilibrium and  
206 half were simulated under a realistic demographic model (based on the out-of-Africa expansion  
207 of European humans; see Materials and Methods). We show that ReLERNN outperforms all other  
208 methods, exhibiting significantly reduced absolute error ( $|r_{predicted} - r_{true}|$ ) under both the demographic  
209 model and under equilibrium assumptions ( $T \leq -31$ ;  $P < 10^{-16}$ ; *post hoc* Welch's two sample *t*-tests  
210 for all comparisons; Figure S14, Figure S15). ReLERNN also exhibited less bias than likelihood-based  
211 methods across a range of sample sizes (Figure 3), although all methods generally performed well  
212 at the largest sample size tested ( $n = 64$ ).

213 We also sought to assess the robustness of ReLERNN to demographic model misspecification,  
214 where different generative models are used for simulating the training and test sets—e.g. training  
215 on assumptions of demographic equilibrium when the test data was generated by a population  
216 bottleneck. Methods robust to this type of misspecification are crucial, as the true demographic  
217 history of a sample is often unknown and methods used to infer population size histories can

218 disagree or be unreliable (see *Figure S21*). Moreover, population size changes alter the landscape  
219 of LD across the genome (e.g. *Slatkin, 1994; Rogers, 2014*), and thus have the potential to reduce  
220 accuracy or produce biased recombination rate estimates.

221 To this end, we trained ReLERNN on examples generated under equilibrium and made predic-  
222 tions on 5000 chromosomes generated by the human demographic model specified above (and  
223 also carried out the reciprocal experiment; *Figure 4*). We compared ReLERNN to the CNN, LDhat,  
224 and LDhelmet, with all methods similarly misspecified (see Materials and Methods). We found that  
225 ReLERNN outperforms these methods under nearly all conditions, exhibiting significantly lower  
226 absolute error under both directions of demographic model misspecification ( $T \leq -26$ ;  $P_{WTT} < 10^{-16}$   
227 for all comparisons, with the exception of the comparison to LDhelmet using 16 chromosomes;  
228 *Figure S16, Figure S17*). We show that the error directly attributed to model misspecification (which  
229 we term marginal error; see Materials and Methods) is occasionally higher in ReLERNN relative to  
230 other methods, even though ReLERNN exhibited the lowest absolute error among methods. As  
231 a prime example of this, we found predictions from LDhelmet were not affected by our misspeci-  
232 fication regime at all, but these predictions were still, on average, less accurate than those made  
233 by a misspecified ReLERNN. Interestingly, marginal error is significantly greater when ReLERNN  
234 was trained on equilibrium simulations and tested on demographic simulations than under the  
235 reciprocal misspecification ( $T = 26.3$ ;  $P_{WTT} < 10^{-16}$ ; *Figure S18*). While this is true, it is important to  
236 note that mean marginal error for ReLERNN, in both directions of misspecification and across all  
237 sample sizes, never exceeded  $3.90 \times 10^{-9}$ , suggesting that the additional information gleaned from  
238 an informative demographic model is limited.

239 In addition to model misspecification, differences in the ratio of homologous gene conversion  
240 events to crossovers can also bias the inference of recombination rates, as conversion tracts  
241 break down LD within the prediction window (*Gay et al., 2007; Przeworski and Wall, 2001*). We  
242 treated the effect of gene conversion as another form of model misspecification, by training on  
243 examples that lacked gene conversion and testing on examples that included gene conversion. As  
244 ReLERNN uses msprime for all training simulations, and msprime cannot currently simulate gene  
245 conversion, we generated all test set simulations with ms (*Hudson, 2002*). We found that including  
246 gene conversion in our simulations biased our predictions, resulting in an overestimate of the true  
247 recombination rate (*Figure S19*). Moreover, the magnitude of this bias increased with the ratio  
248 of gene conversion events to crossovers,  $\frac{r_{GC}}{r_{CO}}$ . As expected, we also observed a similar pattern of  
249 bias for LDhelmet, although the magnitude of bias for LDhelmet was less than that exhibited by  
250 ReLERNN for  $\frac{r_{GC}}{r_{CO}} > 2$  ( $T > 4.37$ ;  $P_{WTT} < 1.32 \times 10^{-5}$ ; *Figure S19*). As errors in genotype calls can mimic  
251 gene conversion—e.g. a heterozygous sample being called as a homozygote—filtering low-quality  
252 SNP calls, either by removing the individual genotype or by masking sites, has the potential to  
253 mitigate gene conversion-induced bias. However, missing genotypes and inaccessible sites have  
254 the potential to introduce their own biases, highlighting an area where deep learning methods may  
255 have a unique advantage over traditional tools.

### 256 **ReLERNN retains high accuracy on simulated low-quality genomic datasets**

257 Deep learning tools have the potential to perform exceptionally well on poor-quality genomic  
258 datasets, such as those with low-quality or low-complexity reference genomes, under sampling  
259 regimes where individual samples are at a premium, or where base- and map-quality scores are  
260 suspect. This is in part because such attributes of genomic quality can be readily incorporated  
261 during training, and deep learning methods can generalize despite these limitations. To address  
262 the potential for ReLERNN to serve as an asset for researchers working with low-quality data—e.g.  
263 those studying non-model organisms—we simulated 1 Mb chromosomes under a randomized  
264 fine-scale recombination landscape, and then masked increasing fractions of both genotypes and  
265 sites. We then trained ReLERNN with both missing genotypes and genome inaccessibility, and  
266 generated predictions on the simulated chromosomes.

267 We show that ReLERNN exhibits high accuracy and low bias on datasets with missing genotypes,



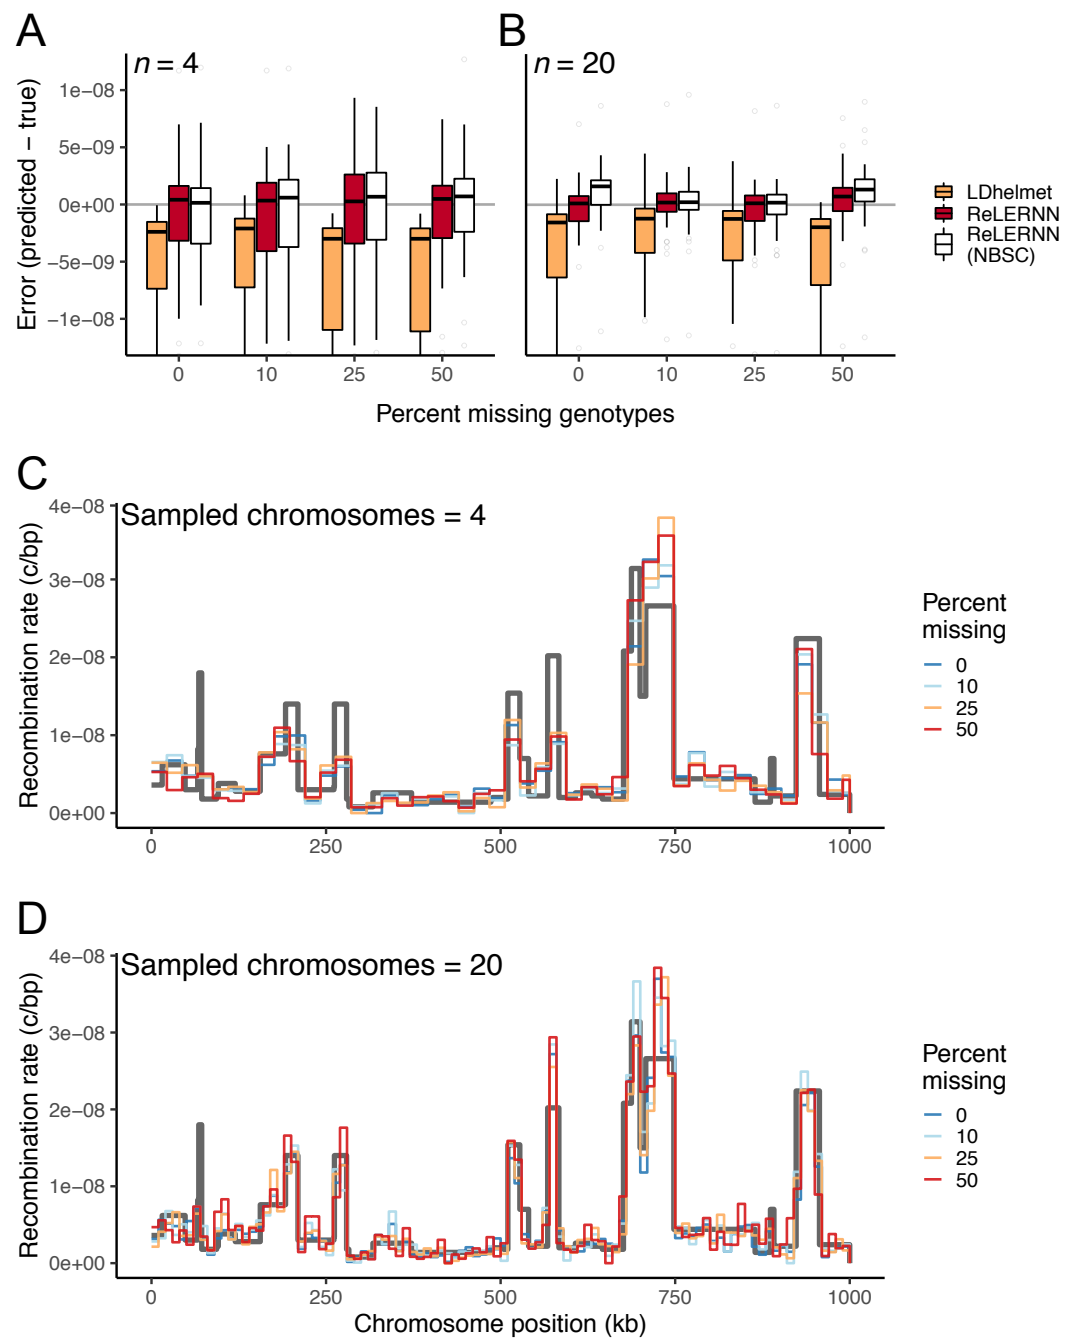

**Figure 5** (A) Distribution of raw error ( $r_{predicted} - r_{true}$ ) for LDhelmet and ReLERNN when presented with varying levels of missing genotypes for simulations with  $n = 4$  and (B)  $n = 20$  chromosomes. (C) Fine-scale rate predictions generated by ReLERNN for a 1 Mb recombination landscape (grey line) simulated with varying levels of missing genotypes, for  $n = 4$  and (D)  $n = 20$  chromosomes.

268 even as the fraction of missing data increases to half of all genotypes (**Figure 5**). Moreover, we found  
269 that ReLERNN had reduced bias and significantly lower absolute error than LDhelmet at 50% missing  
270 genotypes for both  $n = 4$  and  $n = 20$  ( $T \leq -2.8$ ;  $P_{WTT} < 0.007$  for both comparisons). Here we define  
271 missing genotypes as any genotype call set to a . in the VCF, although in theory a simple quality  
272 threshold to identify missing genotypes could also be implemented. Additionally we tested ReLERNN  
273 across increasing levels of genome inaccessibility (up to 75% of all sites inaccessible), simulating  
274 a scenario where the vast majority of sites cannot be accurately mapped—e.g. in low-complexity  
275 genomic regions or for taxa without reference assemblies. Here genome inaccessibility refers to any  
276 site overlapping a window in the accessibility mask, where the entire genotype array at this site is  
277 discarded. Again, ReLERNN exhibited reduced bias in error across all levels of genome accessibility  
278 relative to LDhelmet (**Figure S20**). However, levels of absolute error were not significantly different  
279 between the methods after correcting for multiple tests ( $T \leq -2.1$ ;  $P_{WTT} \geq 0.043$  for all comparisons).  
280 Together these results suggest that ReLERNN may be of particular interest to researchers studying  
281 non-model organisms or for those without the access to high-quality reference assemblies.

## 282 **Recombination landscapes are largely concordant among populations of African *D.*** 283 ***melanogaster***

284 Using our method, we characterized the genome-wide recombination landscapes of three popula-  
285 tions of African *D. melanogaster* (sampled from Cameroon, Rwanda, and Zambia). Each population  
286 was derived from the sequencing of 10 haploid embryos (detailed in **Lack et al., 2015; Pool et al.,**  
287 **2012**), hence these data represent an excellent opportunity to exploit ReLERNN's high accuracy on  
288 small sample sizes. The lengths of genomic windows selected by ReLERNN were roughly consistent  
289 among populations, and ranged from 38 kb for chromosomes 2R, 3L, and 3R in Zambia, to 51 kb  
290 for the X chromosome in Cameroon. We show that fine-scale recombination landscapes are highly  
291 correlated among all three populations of *D. melanogaster* (genome-wide mean pairwise Spearman's  
292  $\rho = 0.76$ ;  $P < 10^{-16}$ ; 100 Kb windows; **Figure 6**). The genome-wide mean pairwise coefficient of  
293 determination between populations was somewhat lower,  $R^2 = 0.63$  ( $P < 10^{-16}$ ; 100 Kb windows),  
294 suggesting there may be important population-specific differences in the fine-scale drivers of  
295 allelic association. These differences may also contribute to within-chromosome differences in  
296 recombination rate between populations. Indeed, we estimate that mean recombination rates are  
297 significantly different among populations for all chromosomes with the exception of chromosome  
298 3L ( $P \leq 3.78 \times 10^{-4}$ ; one-way analysis of variance). Post-hoc pairwise comparisons suggest that  
299 this difference is largely driven by an elevated rate of recombination in Zambia, identified on all  
300 chromosomes ( $P \leq 8.21 \times 10^{-4}$ ; Tukey's HSD tests) except for 3L ( $P_{HSD} \geq 0.15$ ). ReLERNN predicts  
301 the recombination rate in simulated test sets to a high degree of accuracy for all three populations  
302 ( $R^2 \geq 0.93$ ;  $P < 10^{-16}$ ; **Figure S23**), suggesting that we have sufficient power to discern fine-scale  
303 differences in per-base recombination rates across the genome.

304 When comparing our recombination rate estimates to those derived from experimental crosses  
305 of North American *D. melanogaster* (reported in **Comeron et al., 2012**), we find that the coefficients  
306 of determination averaged over all three populations were  $R^2 = 0.46, 0.70, 0.47, 0.08, 0.73$  for chromo-  
307 somes 2L, 2R, 3L, 3R, and X, respectively (**Figure S24**; 1 Mb windows). These results differ from those  
308 observed by **Chan et al. (2012)**, who compared 22 *D. melanogaster* sampled from the same Rwandan  
309 population to the FlyBase map and found  $R^2 = 0.55, 0.63, 0.45, 0.42, 0.41$  for the same chromosomes.  
310 The minor differences we observed between methods for chromosomes 2L, 2R, 3L, and the X  
311 chromosome can likely be attributed to the fact that we are comparing estimates from two different  
312 methods, using different African flies, to a different experimentally derived map. However, the  
313 larger differences found between methods for chromosome 3R seem less likely attributable to  
314 methodological differences. Importantly, African *D. melanogaster* are known to harbor large poly-  
315 morphic inversions often at appreciable frequencies (**Lemeunier and Aulard, 1992; Aulard et al.,**  
316 **2002**). For example, the inversion *In(3R)K* segregates in our Cameroon population at  $p = 0.9$ . It is  
317 potentially these differences in inversion frequencies that contribute to the exceptionally weak

318 correlation observed using our method for chromosome 3R.

319 An important cause of population-specific differences in recombination landscapes might be  
320 population-specific differences in the frequencies of chromosomal inversions, as recombination is  
321 expected to be strongly suppressed between standard and inversion arrangements. To test for an  
322 effect of inversion frequency inferences made by ReLERNN, we resampled haploid genomes from  
323 Zambia to create artificial population samples with the cosmopolitan inversion *In(2L)t* segregating  
324 at varying frequencies,  $p \in \{0.0, 0.2, 0.6, 1.0\}$ . In Zambia, *In(2L)t* arose recently (**Corbett-Detig and**  
325 **Hartl, 2012**) and segregates at  $p = 0.22$  (**Lack et al., 2015**), suggesting that recombination within the  
326 inversion breakpoints may be strongly suppressed in individuals with the inverted arrangement  
327 relative to those with the standard arrangement. For these reasons, we predict that the inferred  
328 recombination rate should decrease as the low-frequency inverted arrangement is increasingly  
329 overrepresented in the set of sampled chromosomes (i.e. as more of the samples contain the high-  
330 LD inverted arrangements). As predicted, we found a strong effect of the sample frequency of *In(2L)t*  
331 on estimated rates of recombination for chromosome 2L in Zambia (**Figure S27**), demonstrating  
332 that ReLERNN is sensitive to the frequency of recent inversions.

333 To further explore population-specific differences in recombination landscapes we took a statisti-  
334 cal outlier approach, whereby we define two types of recombination rate outliers—global outliers  
335 and population-specific outliers (see Materials and Methods). Global outliers are characterized by  
336 windows with exceptionally high variance in rates of recombination between all three populations  
337 (**Figure 6**; red triangles) while population-specific outliers are those windows where the rate of re-  
338 combination in one population is strongly differentiated from the rates in the other two populations  
339 (**Figure 6**; population-colored triangles). We find that population-specific outliers, but not global  
340 outliers, are significantly enriched within inversions ( $P = 0.005$ ; randomization test; **Figure 6**; grey  
341 boxes). Moreover, this enrichment remains significant when extending the inversion boundaries  
342 by up to 250 Kb ( $P_{rand} \leq 0.004$ ). However, extending the inversion boundaries beyond 250 Kb, or  
343 restricting the overlap to windows surrounding only the breakpoints (250 Kb, 500Kb, 1 Mb, 2 Mb),  
344 erodes this pattern ( $P_{rand} \geq 0.055$  for all comparisons), suggesting that the role for inversions in  
345 generating population-specific differences in recombination rates is complex, at least for these  
346 populations.

347 Selection is another important factor that may confound the inference of recombination rates.  
348 For instance selective sweeps generate localized patterns of high LD on either side of the sweep site  
349 (**Kim and Nielsen, 2004; Schrider et al., 2015**), thus regions flanking selective sweeps may mimic  
350 regions of reduced recombination. Inasmuch population-specific selective sweeps are expected to  
351 contribute to population-specific differences in recombination rate estimates. We used diploS/HIC  
352 (**Kern and Schrider, 2018**) to identify hard and soft selective sweeps in our African *D. melanogaster*  
353 populations, and we tested for an excess of recombination rate outliers overlapping with windows  
354 classified as sweeps. In total, diploS/HIC classified 27.4%, 28.1%, and 26.8%, of all genomic windows  
355 as selective sweeps (either "hard" or "soft") for Cameroon, Rwanda, and Zambia, respectively, when  
356 looking at 5kb, non-overlapping windows. The associated False Discovery Rates (FDR) for calling  
357 sweeps in these populations were appreciable: 33.9%, 33.1% and 34.7%, respectively (**Figure S26**).  
358 As expected, windows classified as sweeps had significantly lower rates of recombination relative to  
359 neutral windows in all three populations ( $P_{WTT} \leq 10^{-16}$  for all comparisons; **Figure S25**). However,  
360 we found that neither global nor population-specific outliers were enriched for selective sweeps  
361 ( $P_{rand} \geq 0.246$  for both comparisons), suggesting that, when treated as a class, recombination  
362 rate outliers are not likely driven by sweeps in these populations. When treated separately (i.e.  
363 independent permutation tests for each recombination rate outlier window), we identified 7 outliers  
364 enriched for sweeps at the  $P \leq 0.05$  threshold, corresponding to an expected FDR of 77%. However,  
365 given our FDR for calling sweeps in these populations, our measure of the enrichment in overlap  
366 with recombination rate outliers is likely to be conservative. Two of these outlier windows may  
367 represent potential true positives; an outlier in Cameroon contains 5 out of 6 non-overlapping 5 kb  
368 windows classified as "hard" sweeps, the second from Rwanda has 10 out of 12 windows classified

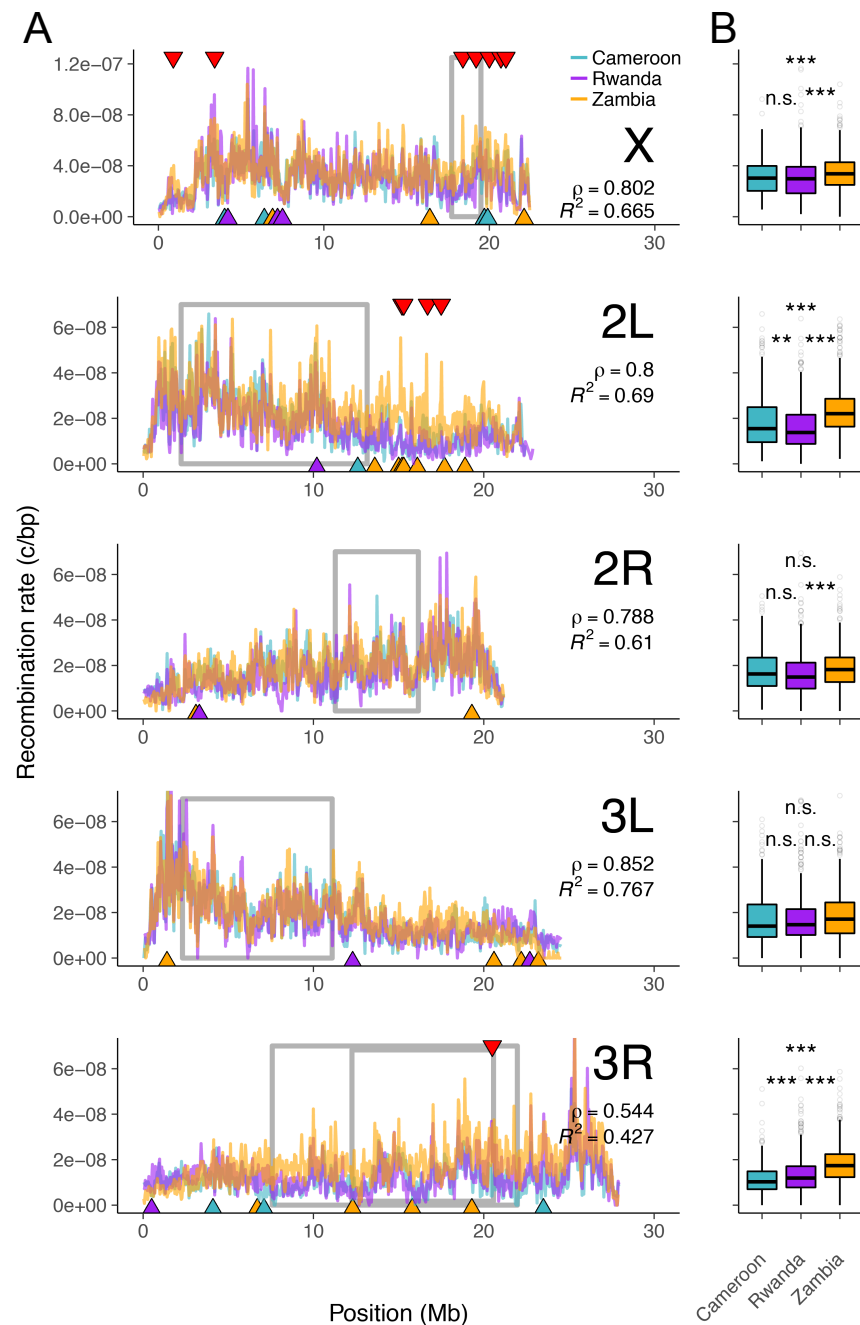

**Figure 6 (A)** Genome-wide recombination landscapes for *D. melanogaster* populations from Cameroon (teal lines), Rwanda (purple lines), and Zambia (orange lines). Grey boxes denote the inversion boundaries predicted to be segregating in these samples (Pool et al., 2012; Corbett-Detig and Hartl, 2012). Red triangles mark the top 1% of global outlier windows for recombination rate. Blue, purple, and orange triangles mark the top 1% of population-specific outlier windows for recombination rate, with triangle color indicating the outlier population (see Materials and Methods). **(B)** Per-chromosome recombination rates for each population. Spearman's  $\rho$  and  $R^2$  are reported as the mean of pairwise estimates between populations for each chromosome. \*\* $P < 0.01$  and \*\*\* $P < 0.001$  are based on Tukey HSD tests for all pairwise comparisons.

369 as "hard" sweeps ( $P_{rand} = 0.0$  for both comparisons). These two recombination rate outlier windows  
370 are potentially ripe for future studies on selective sweeps in these populations, and suggest that in  
371 at least some instances, selection contributes to observed differences in estimates of recombination  
372 rates between *Drosophila* populations.

## 373 Discussion

374 We introduced a new method, ReLERNN, for predicting the genome-wide map of per-base recom-  
375 bination rates from polymorphism data, through the use of deep neural networks. Importantly,  
376 ReLERNN is particularly well-suited to take advantage of emerging small-scale sequencing exper-  
377 iments—e.g. those traditionally associated with the study of non-model organisms. Population  
378 genomics, as a field, relies on estimates of recombination rates to understand the effects of diverse  
379 phenomena ranging from the impacts of natural selection (*Elyashiv et al., 2016*), to patterns of  
380 admixture and introgression (*Price et al., 2009; Brandvain et al., 2014; Schumer et al., 2018*), to  
381 polygenic associations in genome-wide association studies (*Bulik-Sullivan et al., 2015*). As befits  
382 this need, there has been a long tradition of development of statistical methods for estimating  
383 the population recombination parameter,  $\rho = 4Nr$  (*Chan et al., 2012; Gao et al., 2016; Hudson  
384 and Kaplan, 1985; Hudson, 1987, 2002; Li and Stephens, 2003; Lin et al., 2013; McVean et al., 2002;  
385 Myers and Griffiths, 2003; Wakeley, 1997; Wall, 2000; Wiuf, 2002*).

386 We sought to harness the power of deep learning, specifically deep recurrent neural networks, to  
387 address the problem of estimating recombination rates, and in so doing, we developed a workflow  
388 that reconstructs the genome-wide recombination landscape to a high degree of accuracy from very  
389 small sample sizes—e.g. four haploid chromosomes or directly from allele frequencies obtained  
390 through Pool-seq. The use of deep learning has recently revolutionized the fields of computer  
391 vision (*Krizhevsky et al., 2012; Szegedy et al., 2015*), speech recognition (*Hinton et al., 2012*), and  
392 natural language processing (*Sutskever et al., 2014*), and while its use in population genomics has  
393 only recently begun, it is anticipated to be similarly fruitful (*Schrider and Kern, 2018*). The natural  
394 extension of deep learning to population genomic analyses comes as a result of the ways in which  
395 ANNs learn abstract representations of their inputs. In the case of population genomic analyses,  
396 the inputs can be naturally represented as DNA sequence alignments, eliminating the need for  
397 human oversight (and potentially constraint) in the form of statistical summaries (i.e. compression)  
398 of the raw data. ANNs can then learn high-dimensional statistical associations directly from the  
399 sequence alignments, and use these to return highly accurate predictions.

400 ReLERNN utilizes a variant of an ANN, known as a Gated Recurrent Unit (GRU), as its primary  
401 technology. GRU networks excel at identifying temporal associations (*Jozefowicz et al., 2015*), and  
402 therefore we modeled our sequence alignment as a bidirectional time series, where each ordered  
403 SNP represented a new time step along the chromosome. We also modeled the distance between  
404 SNPs using a separate input tensor, and these two inputs were concatenated after passing through  
405 the initial layers of the network (see *Figure 1* inlay). We demonstrated that ReLERNN can predict a  
406 simulated recombination landscape with a high degree of accuracy ( $R^2 = 0.93$ ; *Figure 2*), and that  
407 these predictions remain high, even when using small sample sizes ( $R^2 = 0.82$ ; *Figure S4*). These  
408 predictions compared favorably to those made by a leading composite likelihood methods (LDhat  
409 and LDhelmet; *McVean et al., 2002; Chan et al., 2012*), as well as other machine learning methods  
410 (the CNN and FastEPRR; *Figure 3*).

411 We also showed that ReLERNN can achieve modest accuracy when presented solely with allele  
412 frequencies derived from simulated Pool-seq data, especially when sequenced at the relatively  
413 modest depth of 5X the pool size (*Figure S7*). Moreover, ReLERNN performed well at estimating  
414 recombination rates in the face of missing genotype calls—exhibiting reduced bias when compared  
415 to LDhelmet, even with 50% of genotypes missing (*Figure 5*) or 75% of the genome inaccessible  
416 to SNP calls (*Figure S20*). Together, these results suggest that ReLERNN will be well suited to the  
417 increasing amount of population genomic data from non-model organisms. While the abstract  
418 nature of the data represented in its internal layers constrains our ability to interpret the exact

419 information ReLERNN relies on to inform its predictions, our experiments using incorrect assumed  
420 mutation rates (**Figure S9, Figure S8**) suggests ReLERNN is potentially learning the relative ratio  
421 of recombination rates to mutation rates. Because the assumed rate of mutation governs the  
422 inherent potential for ReLERNN to resolve recombination events—i.e. recombination events cannot  
423 be detected without informative SNPs—and because simulation results suggest ReLERNN is more  
424 accurate when overestimating  $\bar{\mu}$  relative to underestimating it, we suggest erring on the side of  
425 overestimating  $\bar{\mu}$ . For these reasons however, an extra caveat is warranted—use caution when  
426 interpreting the results from ReLERNN as absolute measures of the per-base recombination rate  
427 unless precise mutation rate estimates are also known. This actually presents an opportunity—we  
428 suspect that ReLERNN (or a related network) has the potential to infer the joint landscape of  
429 recombination and mutation, though this task likely poses an additional set of unknown challenges.

430 Demographic model misspecification is another potential source of error that should affect not  
431 only deep learning methods targeted at estimating  $\rho$ , but also likelihood-based methods. Historical  
432 demographic events (e.g. population bottlenecks, rapid expansions, etc.), because they may alter  
433 the structure of LD genome-wide, can bias inference of recombination based on genetic variation  
434 data. Our simulations demonstrated that while all the methods we tested had elevated error in  
435 the context of demographic model misspecification, ReLERNN remained the most accurate across  
436 all misspecification scenarios (**Figure 4**). While we caution against generalizing too much from this  
437 experiment, the model misspecification tested here was extreme: we are replacing a human-like  
438 demography of a bottleneck followed by exponential growth with a model of constant population  
439 size. We suspect that ReLERNN, by using an RNN, is able to encode higher-order allelic associations  
440 across the genome, for instance three-locus or four-locus linkage disequilibrium, and in so doing  
441 capture more of the information available than traditional methods that use composite likelihoods  
442 of two-locus LD summaries. Additionally, there are clear opportunities for future improvements to  
443 ReLERNN. For instance, our simulation studies demonstrated that the GRU used by ReLERNN is also  
444 sensitive to gene conversion events (**Figure S19**), thus the joint estimation of rates of recombination  
445 and gene conversion may be quite feasible. Ultimately, it remains far from clear what network  
446 architectures will be best suited for population genetic inference, though we remain optimistic that  
447 ANNs will prove useful for a variety of applications in the field.

448 A natural application of ReLERNN, due in part to its high accuracy with small sample sizes, was  
449 to characterize and compare the recombination landscapes for multiple populations of African *D.*  
450 *melanogaster*, for which few populations with large sample sizes are currently available. Previous  
451 estimates of genome-wide fine-scale recombination maps in flies have focused on characterizing  
452 recombination in experimental crosses (**Comeron et al., 2012**), or by running LDhat (or the related  
453 LDhelmet) on populations with relatively moderate sample sizes (i.e.  $\geq 22$  samples) (**Chan et al.,**  
454 **2012; Langley et al., 2012**). Here, we applied ReLERNN to three populations for which at least ten  
455 haploid embryos were sequenced: Cameroon, Rwanda, and Zambia (**Lack et al., 2015; Pool et al.,**  
456 **2012**). Generally, recombination landscapes were well correlated among populations. Mean pair-  
457 wise coefficients of determination among all three populations were  $R^2 = 0.69, 0.61, 0.77, 0.43, 0.66$   
458 for chromosomes 2L, 2R, 3L, 3R, and X, respectively. These correlations are notably lower than  
459 those observed in humans (**Myers et al., 2005**) and mice (**Wang et al., 2017**), and one potential  
460 biological cause for this large difference could be the cosmopolitan chromosomal inversions that  
461 segregate in African *D. melanogaster* (**Corbett-Detig and Hartl, 2012; Lack et al., 2015**).

462 Our results suggest that recombination suppression extends well beyond the predicted break-  
463 points of the inversion (at least 5 Mb beyond in the case of *In(2L)*; **Figure S27, Figure S28**). This  
464 large-scale suppression of recombination due to inversions in *Drosophila* has been observed both  
465 directly in experimental crosses (**Dobzhansky and Epling, 1948; Novitski and Braver, 1954; Kulathi-**  
466 **nal et al., 2009; Miller et al., 2016; Fuller et al., 2018**), and indirectly from patterns of variation  
467 surrounding known inversion breakpoints (**Corbett-Detig and Hartl, 2012; Langley et al., 2012**).  
468 While it is true that the negative relationship between inversion frequency and recombination  
469 should only exist for inversions segregating at low frequencies (e.g. crossover suppression is not

470 expected in inversion homozygotes), we predict a negative relationship to dominate in these pop-  
471 ulations, as the majority of polymorphic inversions are young, segregate at low frequencies, and  
472 show elevated LD along their lengths perhaps due to the actions of natural selection (**Corbett-Detig**  
473 **and Hartl, 2012; Lack et al., 2015**).

474 While polymorphic inversions exert strong effects on recombination landscapes, support for  
475 their role in explaining the most diverged regions among populations was mixed—we found that  
476 population-specific recombination rate outliers, but not global outliers, were significantly enriched  
477 within the inversions known to segregate in these populations (**Figure 6**). Moreover, our predictions  
478 for the relative rates of recombination among populations, based on inversion frequencies per  
479 chromosome, were largely not met—the inversions *In(2L)t*, *In(2R)NS*, and *In(3L)Ok* segregate at the  
480 highest frequencies in Zambia, yet this population also has the highest average recombination  
481 rate for these three chromosomes. One might speculate that such a result could be due to the  
482 reapportioning of crossovers that occurs due to the interchromosomal effect (**Schultz and Redfield,**  
483 **1951**), although we have no firm evidence for this. Chromosome 3R, however, did match these  
484 predictions, having inversions segregating at the highest frequencies of any chromosome (e.g.  
485  $p_{In(3R)K} = 0.9$  in Cameroon) and also both the lowest coefficient of determination ( $R^2 = 0.43$ ) and  
486 population-specific recombination rates ranked in accordance with inversion frequencies (**Figure 6**).

487 Interestingly, while we identified two individual outlier regions characterized by numerous  
488 selective sweeps, we did not observe a significant enrichment of sweeps overlapping either global  
489 or population-specific outliers when these outliers were treated as a class of genomic elements.  
490 This is perhaps surprising, given that selective sweeps are known to create characteristic elevations  
491 of LD (**Kim and Nielsen, 2004**), and perhaps could mimic regions with very divergent levels of  
492 recombination in a population-specific way. A number of other evolutionary forces might explain  
493 the existence of our outlier regions as well. For example, mutation rate heterogeneity along  
494 the chromosomes could, in principle, generate spurious peaks or troughs in our estimates of  
495 recombination rate, as ReLERNN in effect scales its per-base recombination rate estimates by  
496 a mutation rate that is assumed to be constant along the chromosome (**Figure S9, Figure S8**).  
497 Moreover, introgression from diverged populations might affect patterns of allelic association in a  
498 local way along the genome (**Schrider et al., 2018; Schumer et al., 2018**). Taken together, our results  
499 suggest that while both inversions and selection can influence population-specific differences in the  
500 landscape of recombination, the preponderance of these differences likely have complex causes.

501 While ReLERNN currently stands as a functional end-to-end pipeline for measuring recombina-  
502 tion rates, the modular design herein presents a number of important opportunities for extension,  
503 with the potential to address myriad questions in population genomics. For example, the RNN  
504 structure we exploit here could be used for inferring the joint distribution of gene conversion  
505 and crossover events, or for inferring the distribution of selection coefficients and/or migration  
506 rates from natural populations. In addition, ReLERNN presents an excellent opportunity for the  
507 implementation of transfer learning, whereby ReLERNN could be trained in-house on an otherwise  
508 prohibitively extensive parameter space, allowing end-users to make accurate predictions by gener-  
509 ating only a small fraction of the current number of simulations and training epochs presently  
510 required. The application of machine learning, and deep learning in particular, to questions in popu-  
511 lation genomics is ripe with opportunity. The software tools that we provide with ReLERNN support  
512 a simple foundation on which the population genetics community might begin this exploration.

## 513 **Materials and Methods**

### 514 **The ReLERNN workflow**

515 The ReLERNN workflow proceeds by the use of four python modules—ReLERNN\_SIMULATE, ReLERNN\_TRAIN,  
516 ReLERNN\_PREDICT, and ReLERNN\_BSCORRECT (or alternatively ReLERNN\_SIMULATE\_POOL, ReLERNN\_TRAIN\_POOL,  
517 and ReLERNN\_PREDICT\_POOL when analysing Pool-seq data). The first three modules are mandatory,  
518 and include functions for estimating parameters such as  $\theta_w$  and  $N_e$  from the inputs, functions for

519 masking genotypes and inaccessible regions of the genome, functions for simulating the training,  
520 validation, and test set, functions for training the neural network, and functions for predicting  
521 rates of recombination along the chromosomes. The fourth module, `ReLERNN_BSCORRECT`, can be  
522 used both with individually sequenced data and Pool-seq data. This module is optional (though  
523 recommended) and includes functions for estimating 95% confidence intervals and implementing  
524 a correction function to reduce bias. The output from `ReLERNN` is a list of genomic windows and  
525 their corresponding recombination rate predictions (reported as per-base crossover events), along  
526 with 95% confidence intervals and corrected predictions through the use of `ReLERNN_BSCORRECT`.

### 527 Estimation of simulation parameters and coalescent simulations

528 `ReLERNN` takes as input a VCF file of phased or unphased biallelic variants. A minimum of four  
529 sample chromosomes must be included, and users should ensure proper quality control of the  
530 input file beforehand—e.g. filtering low-coverage, low-quality, and non-biallelic sites. `ReLERNN`  
531 for Pool-seq takes a single file of genomic coordinates and their corresponding pooled allele  
532 frequency estimates (example files can be found at [https://github.com/kern-lab/ReLERNN/tree/  
533 master/examples](https://github.com/kern-lab/ReLERNN/tree/master/examples)). `ReLERNN` then steps along the chromosome in non-overlapping windows of  
534 length  $l$ , where  $l$  is the minimum window size for which the number of segregating sites,  $S$ , in  
535 all windows is  $\leq 1750$ . By default, we require that  $S \leq 1750$ , as extensive experimentation during  
536 development showed that  $S \gg 1750$  has the potential to cause the so-called exploding gradient  
537 problem to arise during training (see *Pascanu et al., 2013*). However,  $S$  is a user-configurable  
538 parameter (`--maxWinSize`), and can be increased at the expense of potential training failures.  
539 The minimum number of sites in a window is another user-configurable parameter (`--minSites`  
540 in `ReLERNN_PREDICT`) and is set to 50 by default. As a result of independently estimating  $l$  for  
541 each chromosome, the output predictions file may return different window sizes for different  
542 chromosomes, depending on SNP densities.

543 Once  $l$  has been estimated, `ReLERNN_SIMULATE` uses the coalescent simulation software, `msprime`  
544 (*Kelleher et al., 2016*), to independently generate  $10^5$  training examples and  $10^3$  validation and  
545 test examples. By default, these simulations are generated under assumptions of demographic  
546 equilibrium using the following parameters in `msprime`: [`sample_size = n`, where  $n$  is the number  
547 of chromosomes in the VCF;  $Ne = Ne'$ , where  $Ne = \frac{\theta_w}{4\bar{\mu}l_{max}}$  and  $\bar{\mu}$  is the assumed genome-wide per-  
548 base mutation rate,  $l_{max}$  is the maximum value for  $l$  across all chromosomes, and  $\theta_w = \frac{S_{max}}{a_n}$  where  
549  $S_{max}$  is the genome-wide maximum number of segregating sites for all windows and  $a_n = \sum_{i=1}^{n-1} \frac{1}{i}$ ;  
550 `mutation_rate = U( $\mu_{low}, \mu_{high}$ )`, where  $\mu_{low} = \frac{2\bar{\mu}}{3}$  and  $\mu_{high} = \bar{\mu} + \frac{\bar{\mu}}{3}$ ; `recombination_rate = U(0.0,  $r_{max}$ )`, where  
551  $r_{max} = \frac{\rho_{max}}{\bar{\mu}}$ , and `length =  $l_{max}$` ]. In addition to simulating under equilibrium, `ReLERNN` can also  
552 simulate under a population size history inferred by one of three programs: `stairwayplot` (*Liu and*  
553 *Fu, 2015*), `SMC++` (*Terhorst et al., 2016*), or `MSMC` (*Schiffels and Durbin, 2014*). This is handled  
554 by proving the raw final output file to `ReLERNN_SIMULATE` using the `--demographicHistory` option.  
555 When a demographic history is supplied to `ReLERNN`, the  $Ne$  parameter in `msprime` is substituted  
556 with a history of population size changes through time, but the `mutation_rate`, `recombination_rate`, and  
557 `length` parameters are the same as when simulating under equilibrium. After each simulation is  
558 completed, `ReLERNN` writes both the genotype matrix and a vector of SNP coordinates to temporary  
559 `.npy` files, which are later used during batch generation.

### 560 Sequence batch generation and network architectures

561 To reduce the large memory utilization common to the analysis of genomic sequence data, we took  
562 a batch generation approach using the `fit_generator` function in `Keras`—i.e. only small batches  
563 (defaultly `batch_size = 64`) of simulation examples are called into memory at any one time. Moreover,  
564 both the order of examples within each batch, and the order of individuals within a single training  
565 example are randomly shuffled (i.e. sample 1 is not always at the top of the genotype matrix).  
566 Data normalization and padding occurs when a training batch is called, and the genotype and  
567 position arrays are read into memory. The zeroth axis of the genotype and positions arrays is then



568 padded with 0s ( $pad\_size = 5$ ) to  $\max(S_{max}, S_{sim})$ , where  $S_{max}$  is the genome-wide maximum number  
569 of segregating sites for all windows in the samples and  $S_{sim}$  is the maximum number of segregating  
570 sites generated across all training, validation, and test simulations.

571 The targets for each training batch are the per-base recombination rates used by msprime  
572 to simulate each example. These targets are z-score normalized across all training examples.  
573 Genotypes and positions are not normalized, per se. Rather, the genotype matrix encodes alleles as  
574 reference (-1), alternative (1), or padded/missing data (0), and variant positions are encoded along  
575 the real number line (0-1). In the case of ReLERNN for Pool-seq, we convert the simulated genotypes  
576 into allele frequencies by sampling with replacement the vector of alternative and reference alleles  
577 for all sites to the assumed mean read depth of the pool (a user supplied parameter). We then  
578 exclude any site where the sampled variant is fixed or where  $p < 0.05$ , and stack this newly created  
579 allele frequency vector with the vector of positions. Here, allele frequencies (but not positions) are  
580 z-score normalized. The normalized and padded genotype, position, and allele frequency arrays  
581 form the input tensors to our neural networks, and take the shapes defined in **Figure S1**.

582 ReLERNN trains a recurrent neural network with Keras (**Chollet et al., 2015**) using a Tensorflow  
583 backend (**Abadi et al., 2015**). The complete details of our neural architecture can be found in the  
584 python module <https://github.com/kern-lab/ReLERNN/blob/master/ReLERNN/networks.py>, and  
585 a detailed flow diagram showing the connectivity between layers as well as network parameters  
586 can be found in **Figure S1**. Briefly, the ReLERNN neural network utilizes distinct input layers for  
587 the genotype and position tensors, which are later merged using a concatenation layer in Keras.  
588 The genotype tensor is first fed to a GRU layer, as implemented with the bidirectional wrapper  
589 in Keras, and the output of this layer is passed to a dense layer followed by a dropout layer. On  
590 the positions side of the network, the input positions tensor is fed directly to a dense layer and  
591 then to a dropout layer. Dropout (**Srivastava et al., 2014**) was used extensively in our network,  
592 and accuracy was significantly improved when employing dropout relative to networks without  
593 dropout. Once concatenated, output from the dropout layer is passed to a final round of dense  
594 and dropout layers, and the final dense layer returns a single z-score normalized prediction for  
595 each example, which is unnormalized back to units of crossovers per-base. ReLERNN implements  
596 early stopping to terminate training ( $min\_delta = 0.01$ ,  $patience = 100$ ) and uses the "Adam" optimizer  
597 (**Kingma and Ba, 2014**) and a Mean Squared Error ( $MSE$ ) loss function. Our hyper-tuning trials  
598 were completed via a grid search over the set of parameters: recurrent layer output dimensions  
599 (64, 82, 128), loss function ( $MSE$ ,  $MAE$ ), input merge strategy (concatenate, average), and dense  
600 layer output dimensions (64, 128), optimizing for  $MSE$ .

601 Total runtime estimates are highly dependent on 1) the number of epochs needed to train  
602 before the early stopping threshold is met (which can vary extensively) and 2) the coalescent  
603 simulation parameters (most notably recombination rate and population size). As an example, the  
604 total runtime for ReLERNN\_SIMULATE, ReLERNN\_TRAIN, and ReLERNN\_PREDICT on a 1 Mb chromosome  
605 with 90290 segregating sites [parameters:  $n = 20$ ,  $\bar{r} = 7.6 \times 10^{-9}$ , and  $\bar{\mu} = 2.5 \times 10^{-8}$ ], which trained  
606 for 348 epochs before terminating, was 8527 seconds (40 cores Intel Xeon, 1 NVIDIA 2070 GPU).  
607 Total runtimes are not strongly influenced by genome size—e.g. the time needed for ReLERNN to  
608 make predictions on the 90290 SNPs in the example above was less than 8.2 seconds.

### 609 Parametric bootstrap analysis and prediction corrections

610 ReLERNN includes the option to generate confidence intervals around each predicted recombina-  
611 tion rate and correct for potential biases generated during training. To accomplish this we used  
612 parametric bootstrapping, as implemented by ReLERNN\_BSCORRECT in the following way: after the  
613 network has been trained and predictions have been generated, ReLERNN\_BSCORRECT simulates  $10^3$   
614 test examples for each of 100 recombination rate bins drawn from the distribution of recombination  
615 rates used to train the network. The parameters for each new simulation example are drawn from  
616 the same distribution of parameters used to simulate the original training set, with the exception  
617 of *recombination\_rate*, which is held constant for each rate bin. Predictions are then generated for

618 these  $10^5$  simulated test examples using the previously trained network, generating a distribution  
619 of predictions for each respective recombination rate bin. 95% confidence intervals are calculated  
620 for each bin by taking the upper and lower 2.5% predictions from this distribution of rates.

621 The distribution of test predictions can potentially be biased in systematic ways—e.g. predictably  
622 underestimating rates of recombination for those examples with the highest simulated crossover  
623 events, possibly due to the limited ability to resolve high recombination rates with a finite number  
624 of SNPs. From our inferred confidence intervals we can correct for inferred bias in the following  
625 way. The bias correction function takes each empirical prediction,  $r_{predicted}$ , and identifies the nearest  
626 median value,  $\tilde{Y}$ , from the distribution of  $10^5$  bootstrap rate predictions (**Figure S3**). Because each  
627  $\tilde{Y}$  was generated from a rate bin corresponding to the true recombination rate,  $Y$ , we can apply  
628 the correction function,  $f(r_{prediction}) = r_{prediction} + (\tilde{Y} - Y)$ , to all predictions. This method has the  
629 effect of increasing  $r_{predicted}$  in areas of parameter space where we are reasonably confident that we  
630 are underestimating rates and reducing  $r_{predicted}$  in areas where we are likely to be overestimating  
631 rates. ReLERNN\_BSCORRECT is provided as an optional module for this task, as the resimulation of  
632  $10^5$  test examples has the potential to be computationally expensive, and may not be warranted  
633 in all circumstances. However, as stated above, the extent of the computational expense is highly  
634 dependent on the parameters used in the coalescent simulation, and may not always contribute  
635 substantially to total runtimes. For example, ReLERNN\_BSCORRECT increased the total runtime in the  
636 example mentioned above by 8.6 percent (9266 seconds compared to 8527 seconds).

### 637 **Testing the accuracy of ReLERNN on simulated recombination landscapes**

638 To test the accuracy of ReLERNN at recapitulating a dynamic recombination landscape, we ran our  
639 complete ReLERNN workflow on simulation data replicating chromosome 2L of *D. melanogaster*.  
640 Using crossover rates estimated by **Cameron et al. (2012)**, we simulated varying numbers of samples  
641 of *D. melanogaster* chromosome 2L with msprime using the RecombinationMap class [parameters:  
642  $n \in \{4, 20, 50\}$ ,  $\bar{\mu} = 2.8 \times 10^{-9}$ ,  $N_e = 2.5 \times 10^5$ ]. Simulated samples were exported to a VCF file using  
643 ploidy = 1, and all simulations were generated under demographic equilibrium. We used these  
644 simulated VCF files as the input to our ReLERNN pipeline, where we varied the assumed  $\bar{\mu}$  and  
645 the assumed ratio of  $\rho_{max}$  to  $\theta$  given to ReLERNN. The assumed  $\bar{\mu}$  was varied from 50% less than  
646 the rate used in simulations ( $2.8 \times 10^{-9}$ ) to 50% greater than the true rate. Likewise, the ratio of  
647  $\rho_{max}$  to  $\theta$  was either held constant, resulting in the training set containing on average higher or  
648 lower per-base recombination rates than the true rate, or was adjusted to correctly reflect the  
649 true maximum per-base recombination rate used—i.e. approximately  $1.2 \times 10^{-7}$  crossovers per  
650 base. To run ReLERNN on simulated Pool-seq data we used the same VCFs generated above, but  
651 converted all variants to allele frequencies in the following way: for all sites in the VCF, we resampled  
652 the variant haplotypes with replacement to a simulated read depth of  $d \in \{\frac{n}{2}, 1n, 2n, 5n\}$  and then  
653 excluded all sites where the resampled variant was fixed or where  $p < 0.05$ .

### 654 **Comparative methods**

655 We chose to compare ReLERNN to three published methods for estimating recombination rates—  
656 FastEPRR (**Gao et al., 2016**), a 1-dimensional CNN recently described in **Flagel et al. (2018)** and both  
657 LDhat (**McVean et al., 2002**) and LDhelmet (**Chan et al., 2012**). We generated a training set (used  
658 by ReLERNN and the CNN) with  $10^5$  examples and tested all of the methods on an identical set  
659 of  $5 \times 10^3$  simulation examples. We generated two classes of simulations, one simulated under  
660 demographic equilibrium and one using a demographic history derived from European humans  
661 (CEU model; detailed in "ReLERNN\_demographic\_models.py"; **Tennessen et al., 2012**; **Gravel et al.,**  
662 **2011**). Both classes of simulations were generated for  $n \in \{4, 8, 16, 32, 64\}$ , where  $n$  is the number of  
663 chromosomes sampled from the population. All simulations were generated in msprime with the  
664 common set of parameters [ $recombination\_rate = U(0.0, 6.25e^{-8})$ ,  $mutation\_rate = U(1.875e^{-8}, 3.125e^{-8})$ ,  
665  $length = 3e^5$ ].

666 For both ReLERNN and the CNN, the same training set consisting of  $10^5$  examples was used

667 to train each neural network, and the same test examples were used to compare the predictions  
668 produced by each method. Comparisons with LDhat and LDhelmet were made using the above  
669 training examples to parameterize the generation of independent coalescent likelihood lookup  
670 tables. For each set of examples of sample size  $n$ , we used the known value of  $\rho_{max}$  from the  
671 simulated training examples, and we then calculated the average per-base values for  $\theta$  from the  
672 simulated test examples using Watterson's estimator. These parameter values were passed to  
673 the functions for lookup table generation in LDhat and LDhelmet [LDhat options:  $-n$ ,  $-rhomax$ ,  
674  $-theta$  and  $-n\_pts101$ ; LDhelmet options:  $-r0.00.110.01.0100.0$ ]. For LDhelmet we also ran the *pade*  
675 function using the options  $[-x12$  and  $--defect\_threshold40$ ]. The resulting tables were used to make  
676 predictions on our  $5 \times 10^3$  test examples using the *pairwise* function for LDhat and *max\\_lk* function  
677 for LDhelmet [options:  $--max\_lk\_start0.0$  and  $--max\_lk\_resolution0.000001$ ]. Comparisons with  
678 FastEPRR were made by transforming the genotype matrices resulting from our test simulations  
679 into fasta-formatted input files, and running the FastEPRR\_ALN function [using format = 1] in R. As  
680 LDhat, LDhelmet, and FastEPRR all predict  $\rho$ , the resulting predictions were transformed to per-base  
681 recombination rates for direct comparison with ReLERNN using the function  $r = \frac{\rho_{pred} \times \mu_{true}}{\theta_W}$ , where  
682  $\rho_{pred}$  is the prediction output by each method, and  $\theta_W$  and  $\mu_{true}$  are Watterson's estimator and the  
683 true per-base mutation rate used in the simulation example, respectively. To compare accuracy  
684 among methods we directly compared the distribution of absolute errors ( $|r_{predicted} - r_{true}|$ ) for each  
685 method for each set of examples of sample size  $n$ .

686 To test the effects of model misspecification on predictions, we simply directed ReLERNN and  
687 the CNN to use a training set generated under demographic equilibrium for making predictions  
688 on a test set generated under the CEU model, and vice versa. To test for the effects of model  
689 misspecification in LDhat and LDhelmet, we generated a lookup table using parameter values  
690 estimated from the misspecified training set (e.g. the lookup table used for predicting the CEU  
691 model test set was generated by using parameter values directly inferred from training simulations  
692 under equilibrium. We did not directly test the effect of model misspecification using FastEPRR,  
693 as this method takes as input only a fasta sequence file, and therefore the internal training of the  
694 model was not able to be separated from the input sequences. To address the effects of model  
695 misspecification, we also directly compared the distribution of absolute errors ( $|r_{predicted} - r_{true}|$ ).  
696 Additionally, we compared the marginal error directly attributable to model misspecification among  
697 methods. We defined marginal error as  $\epsilon_m - \epsilon_c$ , where  $\epsilon_m$  and  $\epsilon_c$  are equal to  $|r_{predicted} - r_{true}|$  when  
698 the model is misspecified and correctly specified, respectively. We simulated gene conversion test  
699 sets using *ms* (Hudson, 2002), with a mean conversion tract length of 352 bp (corresponding to  
700 the mean empirically derived tract length in *D. melanogaster* (Hilliker et al., 1994)) and simulated a  
701 range of gene conversion to crossover ratios,  $\frac{r_{GC}}{r_{CO}} \in \{0, 1, 2, 4, 8\}$ .

## 702 Training on missing genotypes and inaccessible regions of the genome

703 Deep neural networks, through their aptitude for pattern recognition, can be trained to infer  
704 information from missing data. To harness this ability, we took two different approaches: 1) we  
705 infer patterns of recombination when some fraction of individual genotype calls are absent (missing  
706 genotypes), and 2) we infer these patterns when some fraction of all sites cannot be sequenced  
707 (genome inaccessibility). To simulate levels of missing genotypes similar to those found in real data,  
708 we first sample the distribution of all missing genotypes from the input VCF. We then generate a  
709 missing genotype mask for all windows in the genome and write this mask as a temporary file to  
710 the disk. Simulation proceeds as if all genotypes are present, however during batch generation,  
711 one random mask is drawn from the genomic distribution of masks and applied to the generated  
712 genotype matrix, setting some fraction of genotype calls to 0 (the same element used to pad).  
713 This has the effect of training the network to infer recombination, even where genotype calls  
714 are missing in real data. To infer recombination in the face of genome inaccessibility, we take a  
715 similar approach. Here, ReLERNN accepts an empirical accessibility mask similar to that provided  
716 by the 1000 Genomes project (Consortium et al., 2015). This is provided in BED format, which is

717 then fragmented into smaller arrays corresponding to the window size used by ReLERNN\_SIMULATE.  
718 After simulation proceeds with all sites present, we randomly draw a mask from the distribution  
719 of empirical accessibility masks, and apply it during batch generation, removing all sites marked  
720 inaccessible from the array. We then remove the corresponding sites from the positions array, and  
721 train as usual.

722 To test ReLERNN's ability to learn recombination rates in the face of missing genotypes and  
723 genome inaccessibility, we simulated a 1 Mb randomize dynamic recombination landscape in  
724 msprime. Here we randomly selected 39 sites along the chromosome to serve as recombi-  
725 nation rate breakpoints, generating 40 windows of different rates. For each rate multiplier,  
726  $m \in \{3, 3, 3, 3, 3, 5, 5, 5, 5, 5, 7, 7, 7, 10, 10, 10\}$ , we randomly selected a window to have the recombi-  
727 nation rate  $m\bar{r}$ , where  $\bar{r} = 2.5 \times 10^{-9}$  is the simulated background recombination rate. To simulate missing  
728 genotypes, we randomly set genotype calls in the simulated VCF to a ., corresponding to a fraction  
729 of total genotypes  $\in \{0.0, 0.10, 0.25, 0.50\}$ . To simulate an empirical accessibility mask we simply  
730 sampled directly from the phase 3 1000 Genomes accessibility masks (*Consortium et al., 2015*) and  
731 removed sites in the VCF corresponding to a fraction of total genomic sites  $\in \{0.0, 0.25, 0.50, 0.75\}$ . To  
732 directly compare between the predictions made by ReLERNN and LDhelmet, we then broke the VCF  
733 into windows of the same length (e.g. 22 kb for  $n = 4$  and 10 kb for  $n = 20$  for the simulations with  
734 missing genotypes). We then ran both ReLERNN and LDhelmet as described above, and compared  
735 the distribution of absolute errors ( $|r_{\text{predicted}} - r_{\text{true}}|$ ) for each method for each set of examples of  
736 sample size  $n \in \{4, 20\}$ .

### 737 **Recombination rate variation in *D. melanogaster***

738 We obtained *D. melanogaster* population sequence data from the *Drosophila* Genome Nexus (DGN;  
739 <https://www.johnpool.net/genomes.html>; *Lack et al., 2015*; *Pool et al., 2012*). We converted DGN  
740 "consensus sequence files" to a simulated VCF format, excluding all non-biallelic sites and those  
741 containing missing data. We chose to analyze populations from Cameroon, Rwanda, and Zambia,  
742 as these populations contained at least 10 haploid embryo sequences per population and each  
743 population included multiple segregating chromosomal inversions (supplemental table 1). To ensure  
744 roughly equivalent power to compare rates among populations, we downsampled both Rwanda  
745 and Zambia to 10 chromosomes. We selected individual haploid genomes for each population by  
746 requiring that our sampled inversion frequencies for each of the six segregating inversions—*In(1)Be*,  
747 *In(2L)t*, *In(2R)NS*, *In(3L)Ok*, *In(3R)K*, and *In(3R)P*—closely approximate their population frequencies as  
748 measured in the complete set of haploid genomes for that population. All sample accessions and  
749 their corresponding inversion frequencies are located in the supporting materials.

750 Before running ReLERNN, we first set out to model the demographic history for each population  
751 using each of three methods: stairwayplot (*Liu and Fu, 2015*), SMC++ (*Terhorst et al., 2016*), and  
752 MSMC (*Schiffels and Durbin, 2014*). With the exception of MSMC, all methods were run using default  
753 parameters. For MSMC, the use of default parameters generated predictions that were unusable  
754 (*Figure S22*). For these reasons, and after direct communication with MSMC's authors, we deter-  
755 mined that running MSMC with a sample size of two chromosomes would be the most appropriate.  
756 Using all three methods, we show that inferred historical population sizes are unreliable for these  
757 populations—no two methods recapitulate the same history, and the histories generated by MSMC  
758 vary dramatically depending on the number of samples used (*Figure S21, Figure S22*). For these  
759 reasons, and because results from our simulations suggest that marginal error due to demographic  
760 misspecification is quite low for our method (*Figure S18*), we decided to simulate our training  
761 data under the assumptions of demographic equilibrium [options: -- estimateDemographyFalse  
762 -- assumed Mu3.27e-9 -- upperRhoThetaRatio35].

763 We measured the correlation in recombination rates between each African *D. melanogaster*  
764 populations by recalculating the raw rate for 100 kb sliding windows, as ReLERNN will predict the  
765 rates of recombination in slightly different window sizes, depending on  $\theta$  for each chromosome.  
766 The recombination rate for each 100 kb window was calculated by taking the average of all raw

767 rate windows predicted by ReLERNN, weighted by the fraction that each window overlapped the  
768 larger 100 kb sliding window. Recombination rate outliers were identified in two ways: as global  
769 outliers and population-specific outliers. Global outliers were identified by first calculating the  
770 mean and standard deviation in recombination rates for all three populations in each 100 kb sliding  
771 window. We then used the top 1% of outliers from the distribution of residuals, after fitting a linear  
772 model to the standard deviation on the mean. Population-specific outliers were identified by using  
773 a modification of the population branch statistic (herein PBS\*; *Yi et al., 2010*), whereby we replaced  
774 pairwise  $F_{ST}$  with the pairwise differences in recombination rates. We then used the top 1% of all  
775 PBS\* scores as our population-specific outliers, with each outlier corresponding to a PBS\* score for  
776 a single population.

777 To test the effect of inversion frequency on predicted recombination rates, we resampled  
778 10 haploid chromosomes from the available set of haploid genomes from Zambia to generate  
779 sampled populations containing *In(2L)t* at varying frequencies,  $p \in \{0.0, 0.2, 0.6, 1.0\}$ . We then ran  
780 ReLERNN on chromosome 2L for each of these resampled Zambian populations. We classified  
781 recombination windows by their overlap with the coordinates of *In(2L)t* (as defined in *Corbett-Detig  
782 and Hartl, 2012*), defining windows within the breakpoints (inside), windows up to 3 Mb outside the  
783 breakpoints (flanking), and windows > 3 Mb outside the breakpoints (outside). Recombination rates  
784 were negatively correlated with inversion frequency in our sample, not only within the inversion,  
785 but also in regions 3 Mb outside the inversion (flanking regions) ( $\rho_{Spearman's} = -1$ ;  $P = 0.04$  for both  
786 comparisons). We also saw a similar negative correlation outside the flanking regions, although this  
787 association was weakened relative to that within or flanking the inversion (*Figure S27*). Importantly,  
788 varying the size of the flanking regions (from 1-5 Mb) produced patterns that were qualitatively  
789 identical, suggesting that the effect of inversions on recombination suppression extends far beyond  
790 the inversion breakpoints themselves (*Figure S28*).

791 We also expect that rates of recombination should be correlated with distance to the inversion  
792 breakpoint on smaller spatial scales. Likewise, recombination rates in the inversion interior (> 2 Mb  
793 from the breakpoints) are expected to be higher than in those regions immediately surrounding  
794 the breakpoints. To test this we looked at the recombination rates in our African *D. melanogaster*  
795 populations, binned by distance to the nearest inversion breakpoints segregating in these popula-  
796 tions. We classified windows by their overlap with inversion interiors (> 2 Mb inside the inversion  
797 breakpoints) and their overlap with windows within 200 Kb, 500 Kb, 1 Mb, and 2 Mb of inversion  
798 breakpoints. We found that recombination rates in the flanking regions are positively correlated  
799 with distance to inversion breakpoints in both Rwanda and Zambia ( $\rho_{Spearman's} = 1$ ;  $P = 0.04$  for  
800 both comparisons) but not in Cameroon ( $\rho_{Spearman's} = 0.8$ ;  $P = 0.17$ ; *Figure S25*). However, with the  
801 exception of Cameroon (Inversion interior compared to < 250 Kb from breakpoint;  $P_{WTT} = 0.035$ ),  
802 we did not observe this pattern ( $P_{WTT} \geq 0.057$ ; *Figure S25*).

803 We tested for an enrichment of both global and population-specific outliers within inversions  
804 by randomization tests, permuting the labels for outliers  $10^4$  times and counting the overlap with  
805 inversions for each permutation to calculate the empirical p-values. We also tested for an effect of  
806 selection on recombination rates in these populations, by running diploS/HIC (*Kern and Schrider,  
807 2018*) to detect selective sweeps. We ran diploS/HIC on each population, training on simulations  
808 generated under demographic equilibrium. For each population we simulated 2000 training  
809 examples from each of the five classes of regions required by diploS/HIC using the coalescent  
810 simulation software discoal (*Kern and Schrider, 2016*). For simulations which included sweeps we  
811 drew the selection coefficient from a uniform distribution such that  $s \sim U(0.0001, 0.005)$ , the time of  
812 completion of the sweep from  $\tau \sim U(0, 0.05)$ , and the frequency at which a soft sweep first comes  
813 under selection as  $f \sim U(0, 0.1)$ . We drew  $\theta$  from  $U(65, 654)$  and we drew  $\rho$  from an exponential  
814 distribution with mean 1799 and the upper bound truncated at triple the mean. For the discoal  
815 simulations we simulated 605 kb of data with the goal of classification of the central most 55 kb  
816 window. We looked at the overlap with "sweep" windows (those classified as either "hard" or "soft")  
817 and those windows classified as "neutral" by diploS/HIC. Our complete diploS/HIC pipeline for these

818 samples is available in the supporting materials online. All statistical tests were completed in R (*R*  
819 *Core Team, 2018*), with the exception of empirical randomization tests, which were completed using  
820 Python.

#### 821 **Data availability**

822 ReLERNN is currently available at <https://github.com/kern-lab/ReLERNN>. Supporting information,  
823 tables, and figures will be deposited online at the publication journal.

#### 824 **Acknowledgments**

825 The authors would like to gratefully acknowledge Matthew Hahn, Dan Schrider, and Peter Ralph  
826 for their helpful comments and suggestions. This work benefited from access to the University of  
827 Oregon high performance computer, Talapas. JRA, JGG, and ADK were supported by NIH award  
828 R01GM117241 to ADK.

## References

- 829  
830 **Abadi M**, Agarwal A, Barham P, Brevdo E, Chen Z, Citro C, Corrado GS, Davis A, Dean J, Devin M, Ghemawat S,  
831 Goodfellow I, Harp A, Irving G, Isard M, Jia Y, Jozefowicz R, Kaiser L, Kudlur M, Levenberg J, et al., TensorFlow:  
832 Large-Scale Machine Learning on Heterogeneous Systems; 2015. <https://www.tensorflow.org/>, software  
833 available from tensorflow.org.
- 834 **Aulard S**, David JR, Lemeunier F. Chromosomal inversion polymorphism in Afrotropical populations of  
835 *Drosophila melanogaster*. *Genetics Research*. 2002; 79(1):49–63.
- 836 **Ayala D**, Guerrero RF, Kirkpatrick M. Reproductive isolation and local adaptation quantified for a chromosome  
837 inversion in a malaria mosquito. *Evolution: International Journal of Organic Evolution*. 2013; 67(4):946–958.
- 838 **Barton N**. A general model for the evolution of recombination. *Genetics Research*. 1995; 65(2):123–144.
- 839 **Brandvain Y**, Kenney AM, Fligel L, Coop G, Sweigart AL. Speciation and introgression between *Mimulus nasutus*  
840 and *Mimulus guttatus*. *PLoS genetics*. 2014; 10(6):e1004410.
- 841 **Bulik-Sullivan BK**, Loh PR, Finucane HK, Ripke S, Yang J, Patterson N, Daly MJ, Price AL, Neale BM, of the  
842 Psychiatric Genomics Consortium SWG, et al. LD Score regression distinguishes confounding from polygenicity  
843 in genome-wide association studies. *Nature genetics*. 2015; 47(3):291.
- 844 **Chan AH**, Jenkins PA, Song YS. Genome-wide fine-scale recombination rate variation in *Drosophila melanogaster*.  
845 *PLoS genetics*. 2012; 8(12):e1003090.
- 846 **Chan J**, Perrone V, Spence JP, Jenkins PA, Mathieson S, Song YS. A Likelihood-Free Inference Framework for  
847 Population Genetic Data using Exchangeable Neural Networks. *bioRxiv*. 2018; [https://www.biorxiv.org/  
848 content/early/2018/11/05/267211](https://www.biorxiv.org/content/early/2018/11/05/267211), doi: 10.1101/267211.
- 849 **Charlesworth B**. Recombination modification in a fluctuating environment. *Genetics*. 1976; 83(1):181–195.
- 850 **Cho K**, Van Merriënboer B, Bahdanau D, Bengio Y. On the properties of neural machine translation: Encoder-  
851 decoder approaches. *arXiv preprint arXiv:14091259*. 2014; .
- 852 **Chollet F**, et al., Keras. GitHub; 2015. <https://github.com/fchollet/keras>.
- 853 **Chung J**, Gulcehre C, Cho K, Bengio Y. Empirical evaluation of gated recurrent neural networks on sequence  
854 modeling. *arXiv preprint arXiv:14123555*. 2014; .
- 855 **Comeron JM**, Ratnappan R, Bailin S. The Many Landscapes of Recombination in *Drosophila melanogaster*.  
856 *PLOS Genetics*. 2012 10; 8(10):1–21. <https://doi.org/10.1371/journal.pgen.1002905>, doi: 10.1371/jour-  
857 nal.pgen.1002905.
- 858 **Consortium GP**, et al. A global reference for human genetic variation. *Nature*. 2015; 526(7571):68.
- 859 **Corbett-Detig RB**, Hartl DL. Population Genomics of Inversion Polymorphisms in *Drosophila melanogaster*.  
860 *PLOS Genetics*. 2012 12; 8(12):1–15. <https://doi.org/10.1371/journal.pgen.1003056>, doi: 10.1371/jour-  
861 nal.pgen.1003056.
- 862 **Do AT**, Brooks JT, Le Neveu MK, LaRocque JR. Double-strand break repair assays determine pathway choice  
863 and structure of gene conversion events in *Drosophila melanogaster*. *G3: Genes, Genomes, Genetics*. 2014;  
864 4(3):425–432.
- 865 **Dobzhansky T**. Genetics and the origin of species. *Genetics and the origin of species*. 1937; .
- 866 **Dobzhansky T**, Epling C. The suppression of crossing over in inversion heterozygotes of *Drosophila pseudoob-*  
867 *scura*. *Proceedings of the National Academy of Sciences of the United States of America*. 1948; 34(4):137.
- 868 **Elyashiv E**, Sattath S, Hu TT, Strutsovsky A, McVicker G, Andolfatto P, Coop G, Sella G. A genomic map of the  
869 effects of linked selection in *Drosophila*. *PLoS genetics*. 2016; 12(8):e1006130.
- 870 **Feder AF**, Petrov DA, Bergland AO. LDx: estimation of linkage disequilibrium from high-throughput pooled  
871 resequencing data. *PloS one*. 2012; 7(11):e48588.
- 872 **Fisher R**. The genetical theory of natural selection. . 1930; .
- 873 **Fligel L**, Brandvain Y, Schrider DR. The Unreasonable Effectiveness of Convolutional Neural Networks in  
874 Population Genetic Inference. *Molecular Biology and Evolution*. 2018 12; 36(2):220–238. [https://dx.doi.org/10.  
875 1093/molbev/msy224](https://dx.doi.org/10.1093/molbev/msy224), doi: 10.1093/molbev/msy224.

- 876 **Fuller ZL**, Koury SA, Leonard CJ, Young RE, Ikegami K, Westlake J, Richards S, Schaeffer SW, Phadnis N. Extensive  
877 recombination suppression and chromosome-wide differentiation of a segregation distorter in *Drosophila*.  
878 bioRxiv. 2018; <https://www.biorxiv.org/content/early/2018/12/21/504126>, doi: 10.1101/504126.
- 879 **Gao F**, Ming C, Hu W, Li H. New software for the fast estimation of population recombination rates (FastEPRR) in  
880 the genomic era. *G3: Genes, Genomes, Genetics*. 2016; 6(6):1563–1571.
- 881 **Gay J**, Myers S, McVean G. Estimating meiotic gene conversion rates from population genetic data. *Genetics*.  
882 2007; 177(2):881–894.
- 883 **Gravel S**, Henn BM, Gutenkunst RN, Indap AR, Marth GT, Clark AG, Yu F, Gibbs RA, Bustamante CD. Demographic  
884 history and rare allele sharing among human populations. *Proceedings of the National Academy of Sciences*.  
885 2011; 108(29):11983–11988. <https://www.pnas.org/content/108/29/11983>, doi: 10.1073/pnas.1019276108.
- 886 **Graves A**, Jaitly N, Mohamed A. Hybrid speech recognition with Deep Bidirectional LSTM. In: *2013 IEEE Workshop*  
887 *on Automatic Speech Recognition and Understanding, Olomouc, Czech Republic, December 8-12, 2013*; 2013. p.  
888 273–278. <https://doi.org/10.1109/ASRU.2013.6707742>, doi: 10.1109/ASRU.2013.6707742.
- 889 **Hahn MW**. Molecular population genetics. Sinauer Associates; 2018.
- 890 **Hill WG**, Robertson A. The effect of linkage on limits to artificial selection. *Genetics Research*. 1966; 8(3):269–294.
- 891 **Hilliker AJ**, Harauz G, Reaume AG, Gray M, Clark SH, Chovnick A. Meiotic gene conversion tract length distribution  
892 within the rosy locus of *Drosophila melanogaster*. *Genetics*. 1994; 137(4):1019–1026.
- 893 **Hinch AG**, Tandon A, Patterson N, Song Y, Rohland N, Palmer CD, Chen GK, Wang K, Buxbaum SG, Akylbekova  
894 EL, et al. The landscape of recombination in African Americans. *Nature*. 2011; 476(7359):170.
- 895 **Hinton G**, Deng L, Yu D, Dahl G, rahman Mohamed A, Jaitly N, Senior A, Vanhoucke V, Nguyen P, Sainath T,  
896 Kingsbury B. Deep Neural Networks for Acoustic Modeling in Speech Recognition. *Signal Processing Magazine*.  
897 2012; .
- 898 **Hudson RR**. Estimation the recombination parameter of a finite population model without selection. *Genetical*  
899 *Research*. 1987; 50:245–250.
- 900 **Hudson RR**. Generating samples under a Wright-Fisher neutral model of genetic variation. *Bioinformatics*. 2002  
901 Feb; 18(2):337–338.
- 902 **Hudson RR**, Kaplan NL. Statistical properties of the number of recombination events in the history of a sample  
903 of DNA sequences. *Genetics*. 1985; 111(1):147–164.
- 904 **Jaenike J**. Sex chromosome meiotic drive. *Annual Review of Ecology and Systematics*. 2001; 32(1):25–49.
- 905 **Jeffreys AJ**, Kauppi L, Neumann R. Intensely punctate meiotic recombination in the class II region of the major  
906 histocompatibility complex. *Nature genetics*. 2001; 29(2):217.
- 907 **Jeffreys AJ**, May CA. Intense and highly localized gene conversion activity in human meiotic crossover hot spots.  
908 *Nature genetics*. 2004; 36(2):151.
- 909 **Jozefowicz R**, Zaremba W, Sutskever I. An empirical exploration of recurrent network architectures. In: *Interna-*  
910 *tional Conference on Machine Learning*; 2015. p. 2342–2350.
- 911 **Kelleher J**, Etheridge AM, McVean G. Efficient Coalescent Simulation and Genealogical Analysis for Large Sample  
912 Sizes. *PLOS Computational Biology*. 2016 May; 12(5):e1004842. <https://doi.org/10.1371/journal.pcbi.1004842>,  
913 doi: 10.1371/journal.pcbi.1004842.
- 914 **Kern AD**, Schrider DR. Discoal: flexible coalescent simulations with selection. *Bioinformatics*. 2016; 32(24):3839–  
915 3841.
- 916 **Kern AD**, Schrider DR. diploS/HIC: An Updated Approach to Classifying Selective Sweeps. *G3: Genes, Genomes,*  
917 *Genetics*. 2018; 8(6):1959–1970. <http://www.g3journal.org/content/8/6/1959>, doi: 10.1534/g3.118.200262.
- 918 **Kim Y**, Nielsen R. Linkage disequilibrium as a signature of selective sweeps. *Genetics*. 2004; 167(3):1513–1524.
- 919 **Kingma DP**, Ba J. Adam: A method for stochastic optimization. arXiv preprint arXiv:1412.6980. 2014; .
- 920 **Kirkpatrick M**, Barton N. Chromosome inversions, local adaptation and speciation. *Genetics*. 2006; 173(1):419–  
921 434.



- 922 **Kong A**, Thorleifsson G, Gudbjartsson DF, Masson G, Sigurdsson A, Jonasdottir A, Walters GB, Jonasdottir A,  
923 Gylfason A, Kristinsson KT, et al. Fine-scale recombination rate differences between sexes, populations and  
924 individuals. *Nature*. 2010; 467(7319):1099.
- 925 **Krizhevsky A**, Sutskever I, Hinton GE. ImageNet Classification with Deep Convolutional Neural Net-  
926 works. In: Pereira F, Burges CJC, Bottou L, Weinberger KQ, editors. *Advances in Neural Informa-*  
927 *tion Processing Systems 25* Curran Associates, Inc.; 2012.p. 1097–1105. [http://papers.nips.cc/paper/](http://papers.nips.cc/paper/4824-imagenet-classification-with-deep-convolutional-neural-networks.pdf)  
928 [4824-imagenet-classification-with-deep-convolutional-neural-networks.pdf](http://papers.nips.cc/paper/4824-imagenet-classification-with-deep-convolutional-neural-networks.pdf).
- 929 **Kulathinal RJ**, Stevison LS, Noor MA. The genomics of speciation in *Drosophila*: diversity, divergence, and  
930 introgression estimated using low-coverage genome sequencing. *PLoS genetics*. 2009; 5(7):e1000550.
- 931 **Lack JB**, Cardeno CM, Crepeau MW, Taylor W, Corbett-Detig RB, Stevens KA, Langley CH, Pool JE. The *Drosophila*  
932 Genome Nexus: A Population Genomic Resource of 623 *Drosophila melanogaster* Genomes, Including 197  
933 from a Single Ancestral Range Population. *Genetics*. 2015; 199(4):1229–1241. [http://www.genetics.org/](http://www.genetics.org/content/199/4/1229)  
934 [content/199/4/1229](http://www.genetics.org/content/199/4/1229), doi: 10.1534/genetics.115.174664.
- 935 **Langley CH**, Stevens K, Cardeno C, Lee YCG, Schrider DR, Pool JE, Langley SA, Suarez C, Corbett-Detig RB,  
936 Kolaczowski B, et al. Genomic variation in natural populations of *Drosophila melanogaster*. *Genetics*. 2012;  
937 192(2):533–598.
- 938 **Lecun Y**, Bottou L, Bengio Y, Haffner P. Gradient-based learning applied to document recognition. In: *Proceedings*  
939 *of the IEEE*; 1998. p. 2278–2324.
- 940 **Lemeunier F**, Aulard S. Inversion polymorphism in *Drosophila melanogaster*. *Drosophila inversion polymor-*  
941 *phism*. Boca Raton (FL): CRC Press; 1992.
- 942 **Lewontin R**, Kojima Ki. The evolutionary dynamics of complex polymorphisms. *Evolution*. 1960; 14(4):458–472.
- 943 **Li N**, Stephens M. Modeling linkage disequilibrium and identifying recombination hotspots using single-  
944 nucleotide polymorphism data. *Genetics*. 2003; 165(4):2213–2233.
- 945 **Lichten M**. Meiotic recombination: breaking the genome to save it. *Current Biology*. 2001; 11(7):R253–R256.
- 946 **Lin K**, Futschik A, Li H. A fast estimate for the population recombination rate based on regression. *Genetics*.  
947 2013; p. genetics–113.
- 948 **Liu X**, Fu YX. Exploring population size changes using SNP frequency spectra. *Nature Genetics*. 2015 04; 47:555  
949 EP –. <https://doi.org/10.1038/ng.3254>.
- 950 **McVean G**, Awadalla P, Fearnhead P. A coalescent-based method for detecting and estimating recombination  
951 from gene sequences. *Genetics*. 2002; 160(3):1231–1241.
- 952 **Miller DE**, Cook KR, Arvanitakis AV, Hawley RS. Third Chromosome Balancer Inversions Disrupt Protein-Coding  
953 Genes and Influence Distal Recombination Events in *Drosophila melanogaster*. *G3: Genes, Genomes, Genetics*.  
954 2016; 6(7):1959–1967. <https://www.g3journal.org/content/6/7/1959>, doi: 10.1534/g3.116.029330.
- 955 **Muller HJ**. Some genetic aspects of sex. *The American Naturalist*. 1932; 66(703):118–138.
- 956 **Myers S**, Bottolo L, Freeman C, McVean G, Donnelly P. A fine-scale map of recombination rates and hotspots  
957 across the human genome. *Science*. 2005; 310(5746):321–324.
- 958 **Myers SR**, Griffiths RC. Bounds on the minimum number of recombination events in a sample history. *Genetics*.  
959 2003; 163(1):375–394.
- 960 **Nicklas RB**. Chromosome segregation mechanisms. *Genetics*. 1974; 78(1):205–213.
- 961 **Noor MA**, Grams KL, Bertucci LA, Reiland J. Chromosomal inversions and the reproductive isolation of species.  
962 *Proceedings of the National Academy of Sciences*. 2001; 98(21):12084–12088.
- 963 **Novitski E**, Braver G. An analysis of crossing over within a heterozygous inversion in *Drosophila melanogaster*.  
964 *Genetics*. 1954; 39(2):197.
- 965 **Ohta T**, Kimura M. Linkage disequilibrium due to random genetic drift. *Genetics Research*. 1969; 13(1):47–55.
- 966 **Ohta T**, Kimura M. Development of associative overdominance through linkage disequilibrium in finite popula-  
967 tions. *Genetics Research*. 1970; 16(2):165–177.

- 968 **Otto SP**, Barton NH. The evolution of recombination: removing the limits to natural selection. *Genetics*. 1997;  
969 147(2):879–906.
- 970 **O'Reilly PF**, Birney E, Balding DJ. Confounding between recombination and selection, and the Ped/Pop method  
971 for detecting selection. *Genome research*. 2008; 18(8):1304–1313.
- 972 **Parsch J**, Meiklejohn CD, Hartl DL. Patterns of DNA sequence variation suggest the recent action of positive  
973 selection in the janus-ocnus region of *Drosophila simulans*. *Genetics*. 2001; 159(2):647–657.
- 974 **Pascanu R**, Mikolov T, Bengio Y. On the difficulty of training recurrent neural networks. In: *International  
975 conference on machine learning*; 2013. p. 1310–1318.
- 976 **Pool JE**, Corbett-Detig RB, Sugino RP, Stevens KA, Cardeno CM, Crepeau MW, Duchon P, Emerson JJ, Saelao P,  
977 Begun DJ, Langley CH. Population Genomics of Sub-Saharan *Drosophila melanogaster*: African Diversity and  
978 Non-African Admixture. *PLOS Genetics*. 2012 12; 8(12):1–24. <https://doi.org/10.1371/journal.pgen.1003080>,  
979 doi: 10.1371/journal.pgen.1003080.
- 980 **Price AL**, Tandon A, Patterson N, Barnes KC, Rafaels N, Ruczinski I, Beaty TH, Mathias R, Reich D, Myers S.  
981 Sensitive detection of chromosomal segments of distinct ancestry in admixed populations. *PLoS genetics*.  
982 2009; 5(6):e1000519.
- 983 **Przeworski M**, Wall JD. Why is there so little intragenic linkage disequilibrium in humans? *Genetics Research*.  
984 2001; 77(2):143–151.
- 985 **R Core Team**. R: A Language and Environment for Statistical Computing. R Foundation for Statistical Computing,  
986 Vienna, Austria; 2018, <https://www.R-project.org>.
- 987 **Rieseberg LH**. Chromosomal rearrangements and speciation. *Trends in ecology & evolution*. 2001; 16(7):351–  
988 358.
- 989 **Ritz KR**, Noor MA, Singh ND. Variation in recombination rate: adaptive or not? *Trends in Genetics*. 2017;  
990 33(5):364–374.
- 991 **Rogers AR**. How population growth affects linkage disequilibrium. *Genetics*. 2014; 197(4):1329–1341.
- 992 **Russakovsky O**, Deng J, Su H, Krause J, Satheesh S, Ma S, Huang Z, Karpathy A, Khosla A, Bernstein M, Berg AC,  
993 Fei-Fei L. ImageNet Large Scale Visual Recognition Challenge. *Int J Comput Vision*. 2015 Dec; 115(3):211–252.  
994 <http://dx.doi.org/10.1007/s11263-015-0816-y>, doi: 10.1007/s11263-015-0816-y.
- 995 **Schiffels S**, Durbin R. Inferring human population size and separation history from multiple genome sequences.  
996 *Nature Genetics*. 2014 06; 46:919 EP –. <https://doi.org/10.1038/ng.3015>.
- 997 **Schrider DR**, Ayroles J, Matute DR, Kern AD. Supervised machine learning reveals introgressed loci in the  
998 genomes of *Drosophila simulans* and *D. sechellia*. *PLoS genetics*. 2018; 14(4):e1007341.
- 999 **Schrider DR**, Kern AD. Supervised Machine Learning for Population Genetics: A New Paradigm. *Trends in  
1000 Genetics*. 2018 Apr; 34(4):301–312. <https://doi.org/10.1016/j.tig.2017.12.005>, doi: 10.1016/j.tig.2017.12.005.
- 1001 **Schrider DR**, Mendes FK, Hahn MW, Kern AD. Soft shoulders ahead: spurious signatures of soft and partial  
1002 selective sweeps result from linked hard sweeps. *Genetics*. 2015; 200(1):267–284.
- 1003 **Schultz J**, Redfield H. Interchromosomal effects on crossing over in *Drosophila*. In: *Cold Spring Harbor symposia  
1004 on quantitative biology*, vol. 16 Cold Spring Harbor Laboratory Press; 1951. p. 175–197.
- 1005 **Schumer M**, Xu C, Powell DL, Durvasula A, Skov L, Holland C, Blazier JC, Sankaraman S, Andolfatto P, Rosen-  
1006 thal GG, Przeworski M. Natural selection interacts with recombination to shape the evolution of hybrid  
1007 genomes. *Science*. 2018; 360(6389):656–660. <https://science.sciencemag.org/content/360/6389/656>, doi:  
1008 10.1126/science.aar3684.
- 1009 **Singh ND**, Stone EA, Aquadro CF, Clark AG. Fine-scale heterogeneity in crossover rate in the garnet-scalloped  
1010 region of the *Drosophila melanogaster* X chromosome. *Genetics*. 2013; 194(2):375–387.
- 1011 **Slatkin M**. Linkage disequilibrium in growing and stable populations. *Genetics*. 1994; 137(1):331–336.
- 1012 **Smith JM**, Haigh J. The hitch-hiking effect of a favourable gene. *Genetics Research*. 1974; 23(1):23–35.
- 1013 **Srivastava N**, Hinton G, Krizhevsky A, Sutskever I, Salakhutdinov R. Dropout: a simple way to prevent neural  
1014 networks from overfitting. *The journal of machine learning research*. 2014; 15(1):1929–1958.

- 1015 **Sturtevant A.** A case of rearrangement of genes in *Drosophila*. *Proceedings of the National Academy of*  
1016 *Sciences of the United States of America*. 1921; 7(8):235.
- 1017 **Sutskever I, Vinyals O, Le QV.** Sequence to Sequence Learning with Neural Networks. In: *Proceedings of the 27th*  
1018 *International Conference on Neural Information Processing Systems - Volume 2 NIPS'14*, Cambridge, MA, USA: MIT  
1019 Press; 2014. p. 3104–3112. <http://dl.acm.org/citation.cfm?id=2969033.2969173>.
- 1020 **Szegedy C, Liu W, Jia Y, Sermanet P, Reed SE, Anguelov D, Erhan D, Vanhoucke V, Rabinovich A.** Going deeper  
1021 with convolutions. In: *IEEE Conference on Computer Vision and Pattern Recognition, CVPR 2015, Boston, MA, USA,*  
1022 *June 7-12, 2015*; 2015. p. 1–9. <https://doi.org/10.1109/CVPR.2015.7298594>, doi: 10.1109/CVPR.2015.7298594.
- 1023 **Tennessen JA, Bigham AW, O'Connor TD, Fu W, Kenny EE, Gravel S, McGee S, Do R, Liu X, Jun G, Kang HM,**  
1024 **Jordan D, Leal SM, Gabriel S, Rieder MJ, Abecasis G, Altshuler D, Nickerson DA, Boerwinkle E, Sunyaev S, et al.**  
1025 **Evolution and Functional Impact of Rare Coding Variation from Deep Sequencing of Human Exomes. *Science*.**  
1026 **2012; 337(6090):64–69. <https://science.sciencemag.org/content/337/6090/64>, doi: 10.1126/science.1219240.**
- 1027 **Terhorst J, Kamm JA, Song YS.** Robust and scalable inference of population history from hundreds of unphased  
1028 whole genomes. *Nature Genetics*. 2016 12; 49:303 EP –. <https://doi.org/10.1038/ng.3748>.
- 1029 **Vincent P, Larochelle H, Bengio Y, Manzagol PA.** Extracting and Composing Robust Features with Denoising  
1030 Autoencoders. In: *Proceedings of the 25th International Conference on Machine Learning ICML '08*, New York, NY,  
1031 USA: ACM; 2008. p. 1096–1103. <http://doi.acm.org/10.1145/1390156.1390294>, doi: 10.1145/1390156.1390294.
- 1032 **Wakeley J.** Using the variance of pairwise differences to estimate the recombination rate. *Genetics Research*.  
1033 1997; 69(1):45–48.
- 1034 **Wall JD.** A comparison of estimators of the population recombination rate. *Molecular Biology and Evolution*.  
1035 2000; 17(1):156–163.
- 1036 **Wang RJ, Gray MM, Parmenter MD, Broman KW, Payseur BA.** Recombination rate variation in mice from an  
1037 isolated island. *Molecular ecology*. 2017; 26(2):457–470.
- 1038 **White MJD.** *Animal cytology and evolution*. CUP Archive; 1977.
- 1039 **Winckler W, Myers SR, Richter DJ, Onofrio RC, McDonald GJ, Bontrop RE, McVean GA, Gabriel SB, Reich D,**  
1040 **Donnelly P, et al.** Comparison of fine-scale recombination rates in humans and chimpanzees. *Science*. 2005;  
1041 308(5718):107–111.
- 1042 **Wiuf C.** On the minimum number of topologies explaining a sample of DNA sequences. *Theoretical population*  
1043 *biology*. 2002; 62(4):357–363.
- 1044 **Yi X, Liang Y, Huerta-Sanchez E, Jin X, Cuo ZXP, Pool JE, Xu X, Jiang H, Vinckenbosch N, Korneliussen TS, Zheng H,**  
1045 **Liu T, He W, Li K, Luo R, Nie X, Wu H, Zhao M, Cao H, Zou J, et al.** Sequencing of 50 human exomes reveals  
1046 adaptation to high altitude. *Science (New York, NY)*. 2010 07; 329(5987):75–78. <https://www.ncbi.nlm.nih.gov/pubmed/20595611>, doi: 10.1126/science.1190371.
- 1048 **Zickler D, Kleckner N.** Recombination, pairing, and synapsis of homologs during meiosis. *Cold Spring Harbor*  
1049 *perspectives in biology*. 2015; 7(6):a016626.

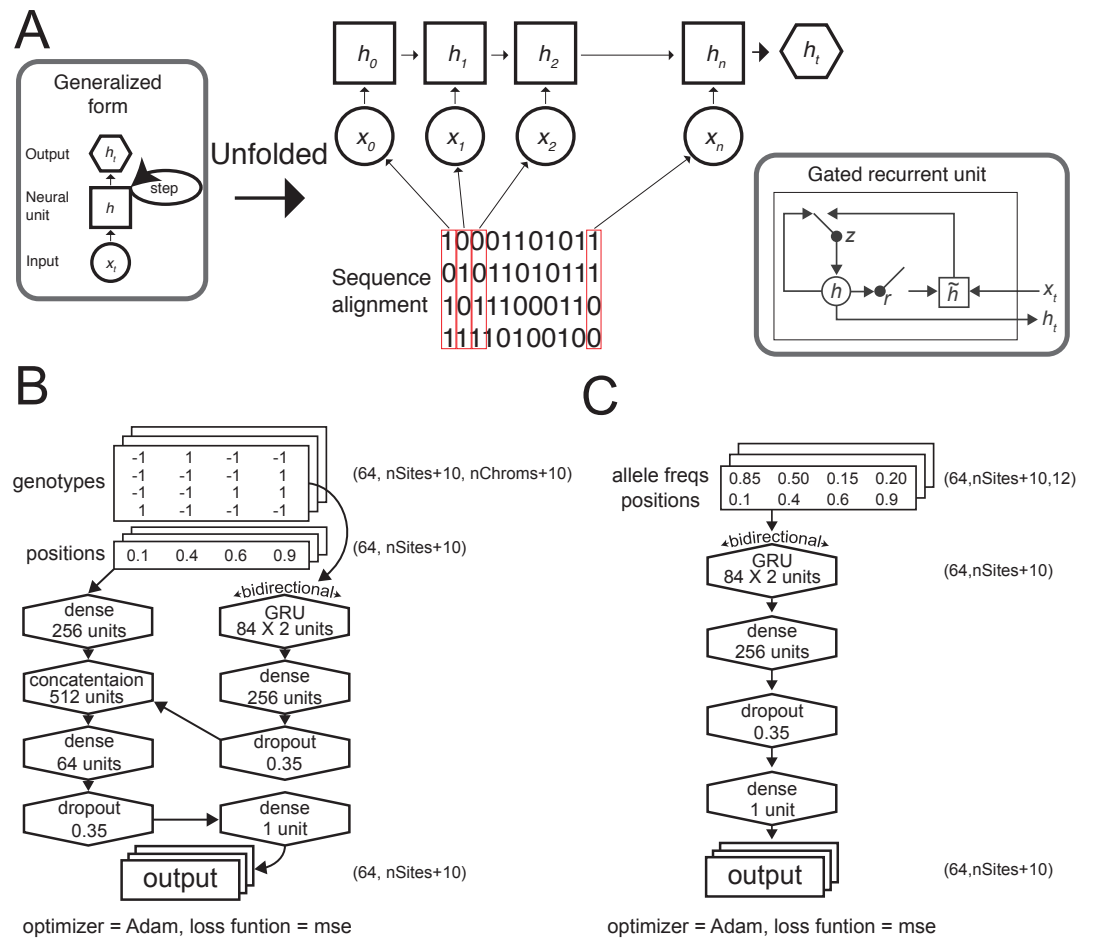

**Figure S1 (A, left)** Generalized form for a recurrent neural network trained on a genomic sequence alignment. **(A, right)** Generalized form of each gated recurrent unit, where  $r$ ,  $z$ ,  $h_t$ , and  $\tilde{h}_t$  correspond to the reset gate, update gate, activation, and candidate activation, respectively (Choi et al., 2014). **(B)** Cartoon depicting the neural network architectures used in ReLERNN for individually sequenced genomes or **(C)** pooled sequences. Tensor shapes are shown for the default parameters [ $batchsize = 64$ ,  $padsize = 5$ ].

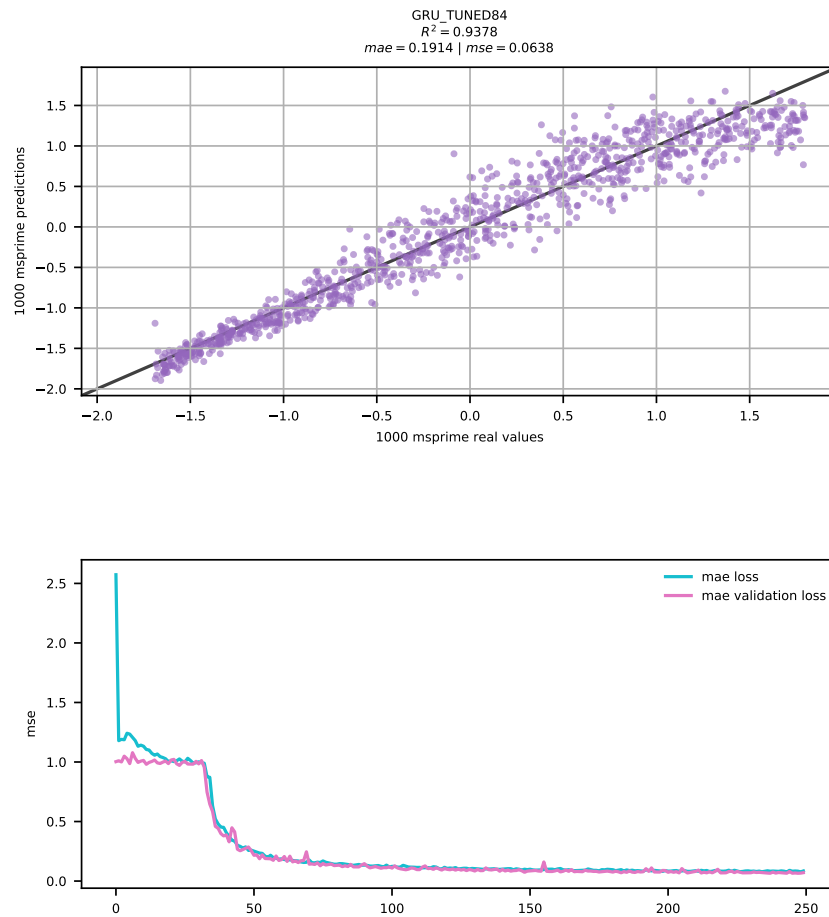

**Figure S2** ReLERNN training and test results. **(Top)** Scatter plot of raw (unnormalized) predictions for 1000 test examples using ReLERNN with the same parameters used in **Figure 2**. Mean absolute error and mean squared error are shown. **(Bottom)** Line graph showing the convergence of loss (measured by mean squared error) over time (epochs) during training on the same data as above, for both the training set (blue lines) and the validation set (purple lines).

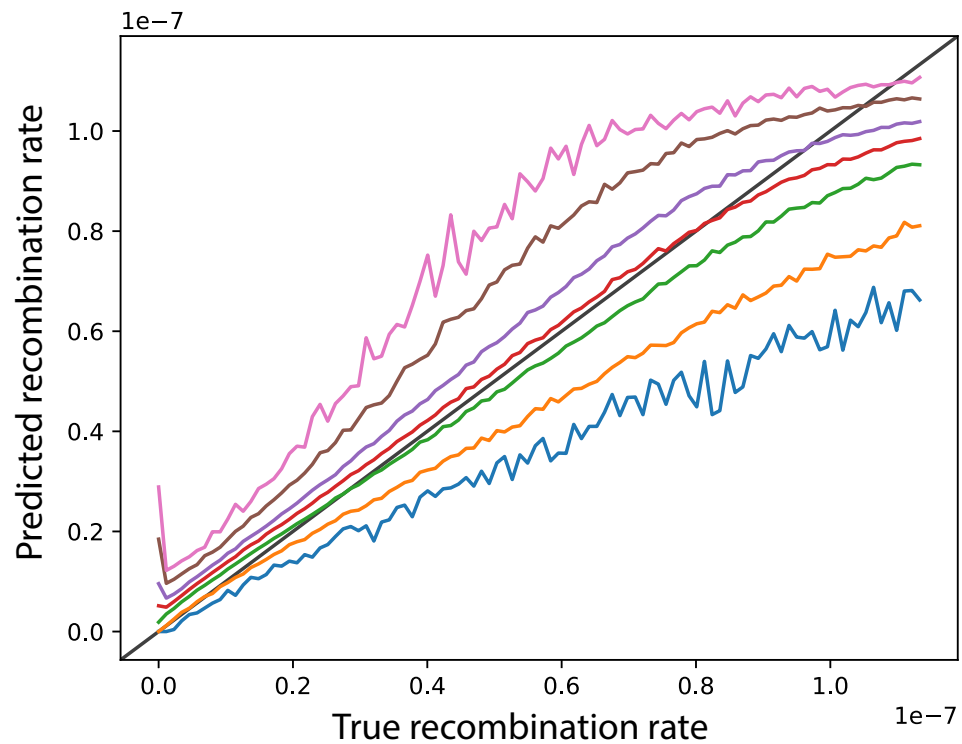

**Figure S3** A characteristic example distribution of parametric bootstrapping predictions, as implemented by ReLERNN\_BSCORRECT. Lines represent the minimum (blue), lower 5% (orange), lower 25% (green), median (red), upper 25% (purple), upper 95% (brown), and maximum (pink) bounds for each of 1000 replicate simulations and predictions (y-axis) across 100 recombination rate bins (x-axis)

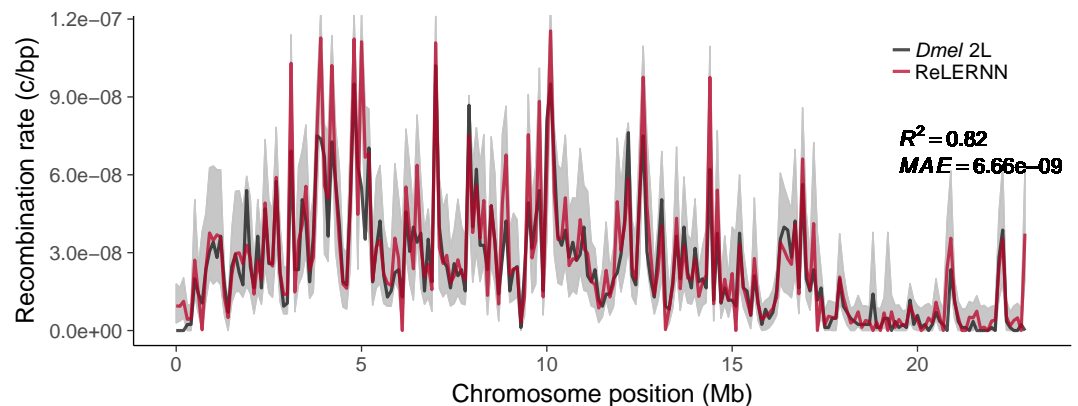

**Figure S4** Recombination rate predictions for a simulated *Drosophila* chromosome (black line) using ReLERNN (red line). The recombination landscape was simulated for  $n = 4$  chromosomes under mutation-drift equilibrium using msprime (Kelleher et al., 2016), with per-base crossover rates derived from *D. melanogaster* chromosome 2L (Comeron et al., 2012). Gray ribbons represent 95% confidence intervals.  $R^2$  is reported for the general linear model of predicted rates on true rates and mean absolute error was calculated across all 100 kb windows.

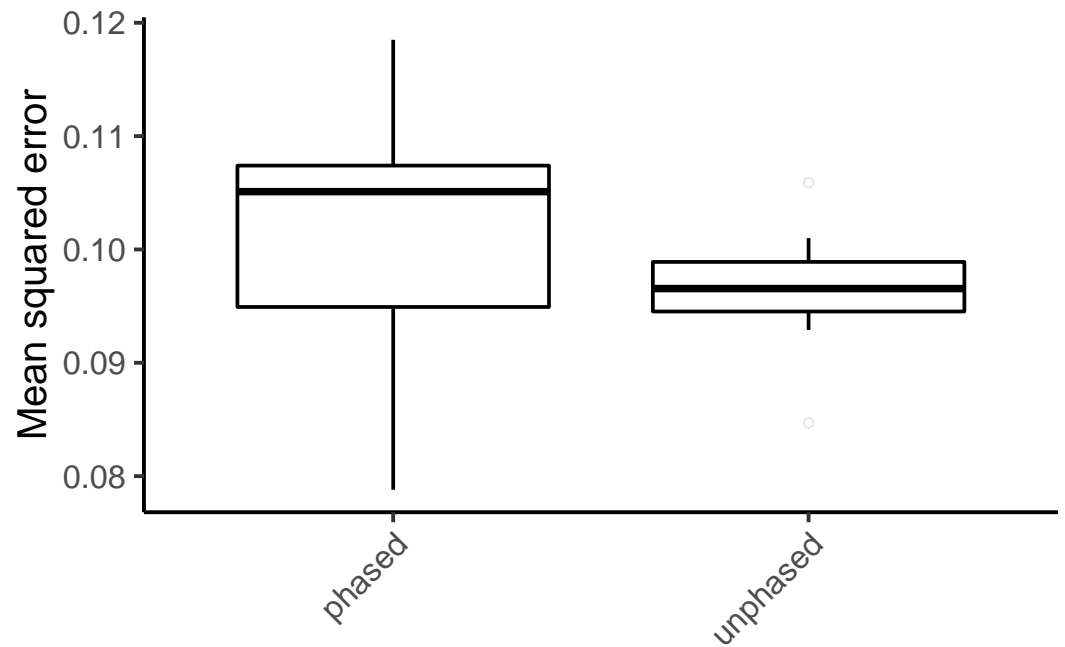

**Figure S5** Mean squared error for ReLERNN predictions on 10 replicates of 1000 test simulations using 100% correctly phased input genotypes and completely unphased genotypes. All simulations used the recombination map derived from *D. melanogaster* chromosome 2L (Comeron *et al.*, 2012).

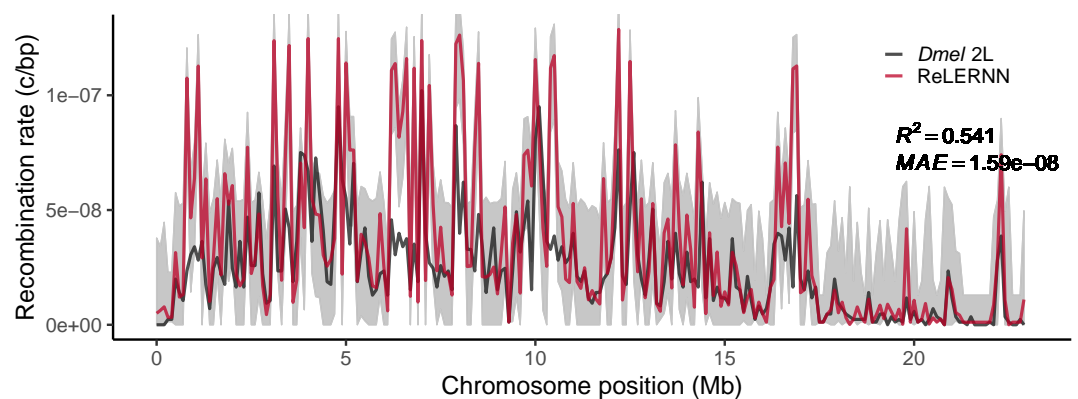

**Figure S6** Recombination rate predictions from Pool-seq data for a simulated *Drosophila* chromosome (black line) using ReLERNN (red line). The recombination landscape was simulated for  $n = 50$  chromosomes and a read depth of 50X, under mutation-drift equilibrium using msprime (Kelleher *et al.*, 2016), with per-base crossover rates derived from *D. melanogaster* chromosome 2L (Comeron *et al.*, 2012). Gray ribbons represent 95% confidence intervals.  $R^2$  is reported for the general linear model of predicted rates on true rates and mean absolute error was calculated across all 100 kb windows.

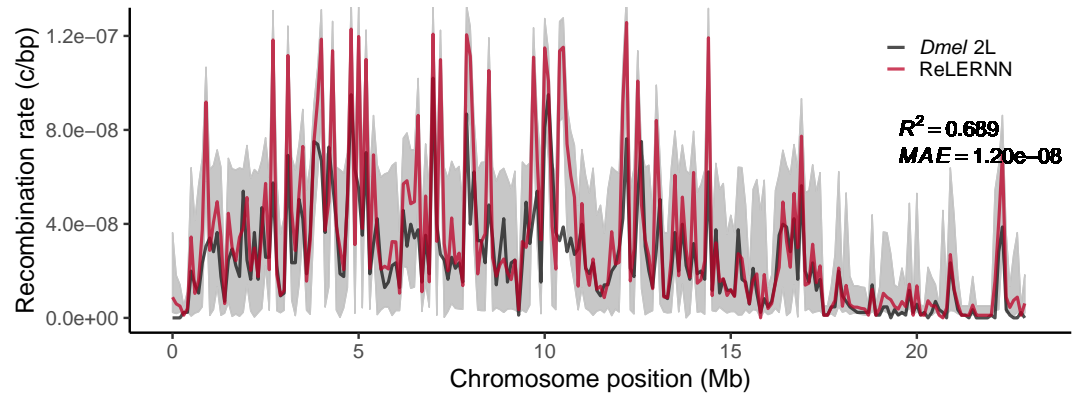

**Figure S7** Recombination rate predictions from Pool-seq data for a simulated *Drosophila* chromosome (black line) using ReLERNN (red line). The recombination landscape was simulated for  $n = 50$  chromosomes and a read depth of  $250X$ , under mutation-drift equilibrium using msprime (Kelleher et al., 2016), with per-base crossover rates derived from *D. melanogaster* chromosome 2L (Cameron et al., 2012). Gray ribbons represent 95% confidence intervals.  $R^2$  is reported for the general linear model of predicted rates on true rates and mean absolute error was calculated across all 100 kb windows.

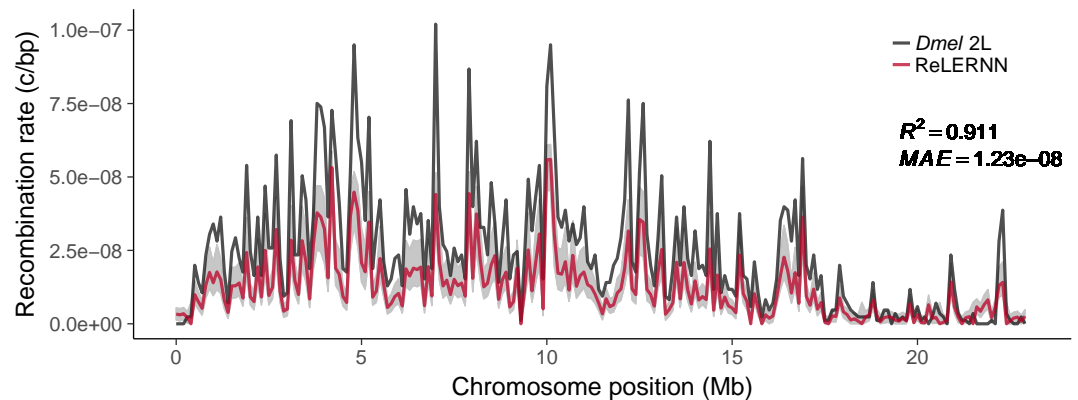

**Figure S8** Recombination rate predictions for a simulated *Drosophila* chromosome (black line) using ReLERNN (red line). The recombination landscape was simulated for  $n = 20$  chromosomes under mutation-drift equilibrium using msprime (Kelleher et al., 2016), with per-base crossover rates derived from *D. melanogaster* chromosome 2L (Cameron et al., 2012). Here the per-base mutation rate was assumed to be 50% less than the rate used for simulation. Gray ribbons represent 95% confidence intervals.  $R^2$  is reported for the general linear model of predicted rates on true rates and mean absolute error was calculated across all 100 kb windows.



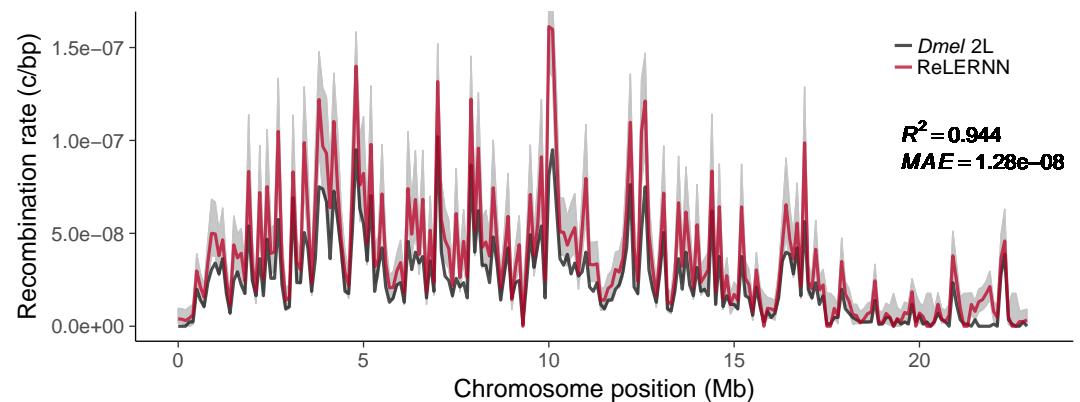

**Figure S9** Recombination rate predictions for a simulated *Drosophila* chromosome (black line) using ReLERNN (red line). The recombination landscape was simulated for  $n = 20$  chromosomes under mutation-drift equilibrium using msprime (Kelleher et al., 2016), with per-base crossover rates derived from *D. melanogaster* chromosome 2L (Cameron et al., 2012). Here the per-base mutation rate was assumed to be 50% greater than the rate used for simulation. Gray ribbons represent 95% confidence intervals.  $R^2$  is reported for the general linear model of predicted rates on true rates and mean absolute error was calculated across all 100 kb windows.

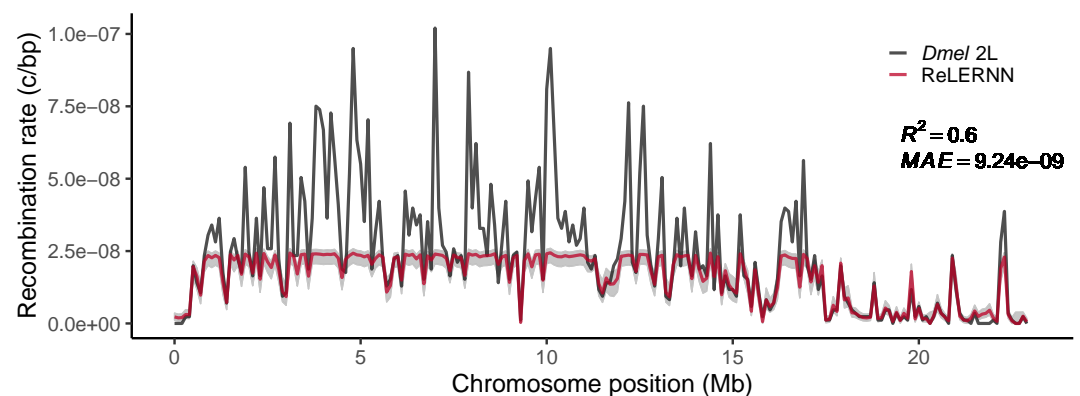

**Figure S10** Recombination rate predictions for a simulated *Drosophila* chromosome (black line) using ReLERNN (red line). The recombination landscape was simulated for  $n = 20$  chromosomes under mutation-drift equilibrium using msprime (Kelleher et al., 2016), with per-base crossover rates derived from *D. melanogaster* chromosome 2L (Cameron et al., 2012). Here the per-base mutation rate was assumed to be equal to the true rate, but  $\rho_{max}$  was assumed to be  $\frac{\rho_{max}}{5}$ . Gray ribbons represent 95% confidence intervals.  $R^2$  is reported for the general linear model of predicted rates on true rates and mean absolute error was calculated across all 100 kb windows.

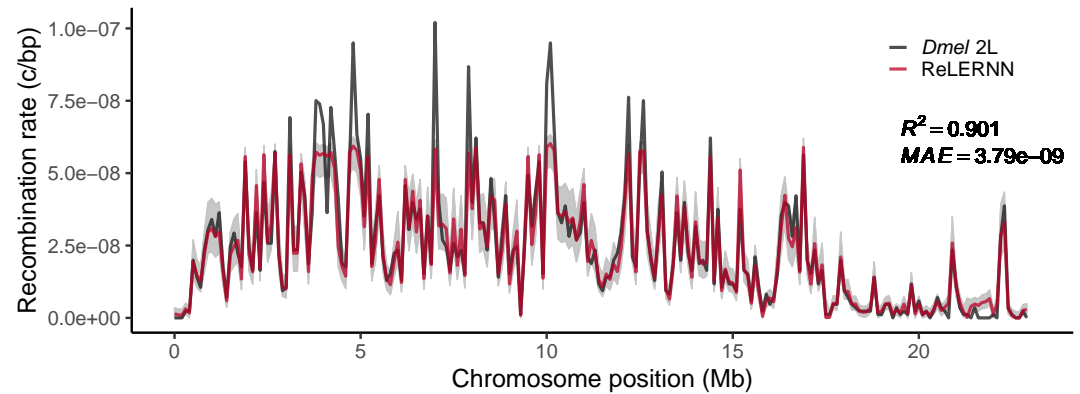

**Figure S11** Recombination rate predictions for a simulated *Drosophila* chromosome (black line) using ReLERNN (red line). The recombination landscape was simulated for  $n = 20$  chromosomes under mutation-drift equilibrium using msprime (Kelleher et al., 2016), with per-base crossover rates derived from *D. melanogaster* chromosome 2L (Comeron et al., 2012). Here the per-base mutation rate was assumed to be equal to the true rate, but  $\rho_{max}$  was assumed to be  $\frac{\rho_{max}}{2}$ . Gray ribbons represent 95% confidence intervals.  $R^2$  is reported for the general linear model of predicted rates on true rates and mean absolute error was calculated across all 100 kb windows.

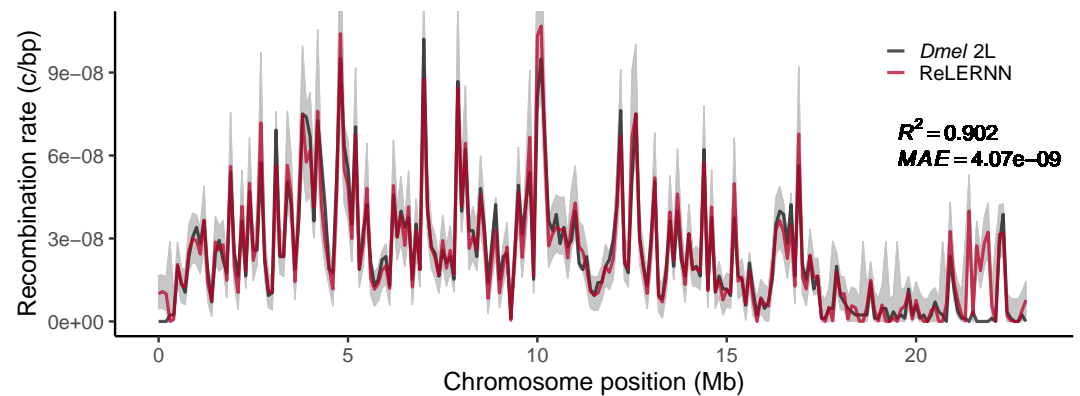

**Figure S12** Recombination rate predictions for a simulated *Drosophila* chromosome (black line) using ReLERNN (red line). The recombination landscape was simulated for  $n = 20$  chromosomes under mutation-drift equilibrium using msprime (Kelleher et al., 2016), with per-base crossover rates derived from *D. melanogaster* chromosome 2L (Comeron et al., 2012). Here the per-base mutation rate was assumed to be equal to the true rate, but  $\rho_{max}$  was assumed to be  $2\rho_{max}$ . Gray ribbons represent 95% confidence intervals.  $R^2$  is reported for the general linear model of predicted rates on true rates and mean absolute error was calculated across all 100 kb windows.

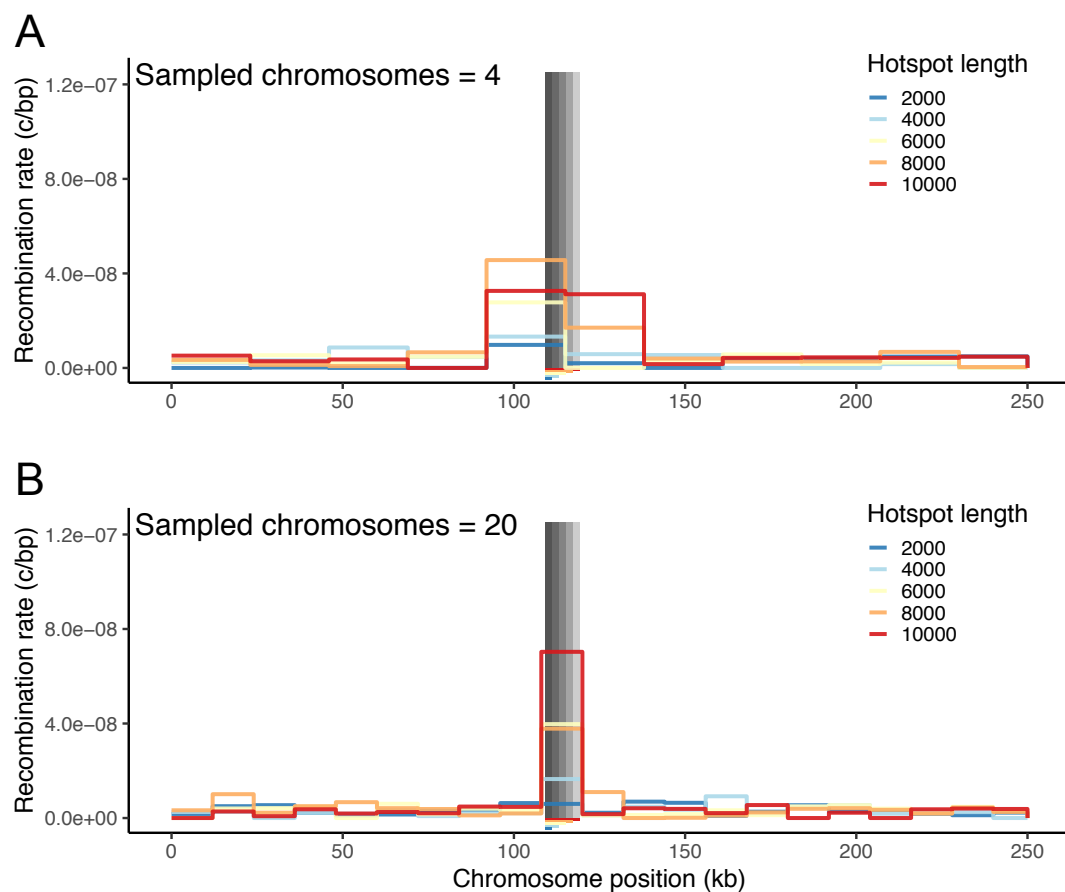

**Figure S13 (A)** Fine-scale rate predictions generated by ReLERNN for simulated recombination hot spots of varying lengths ( $length \in \{2kb, 4kb, 6kb, 8kb, 10kb\}$ ,  $r_{background} = 2.5e^{-9}$ ,  $r_{hotspot} = 1.25e^{-7}$ ) for  $n = 4$  and **(B)**  $n = 20$  chromosomes.

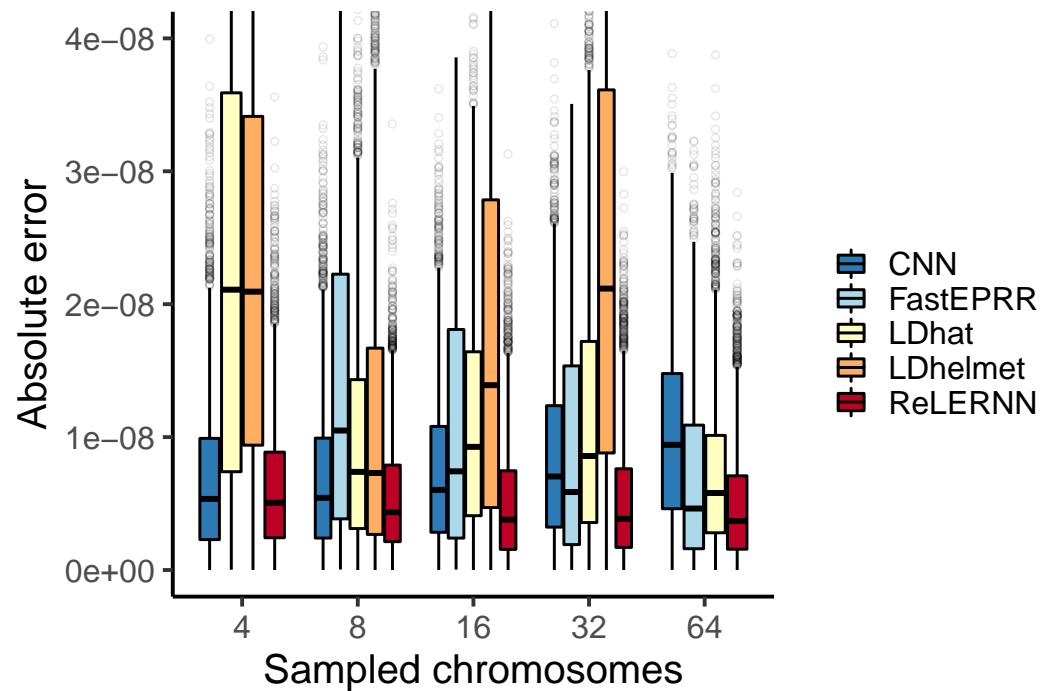

**Figure S14** Distribution of absolute error ( $|r_{\text{predicted}} - r_{\text{true}}|$ ) for each method across 5000 simulated chromosomes (1000 for FastEPRR). Independent simulations were run under a model of demographic equilibrium. Sampled chromosomes indicate the number of independent sequences that were sampled from each msprime (Kelleher *et al.*, 2016) coalescent simulation. LDhelmet was not able to be used with  $n = 64$  chromosomes, and FastEPRR was not able to be used with  $n = 4$ .

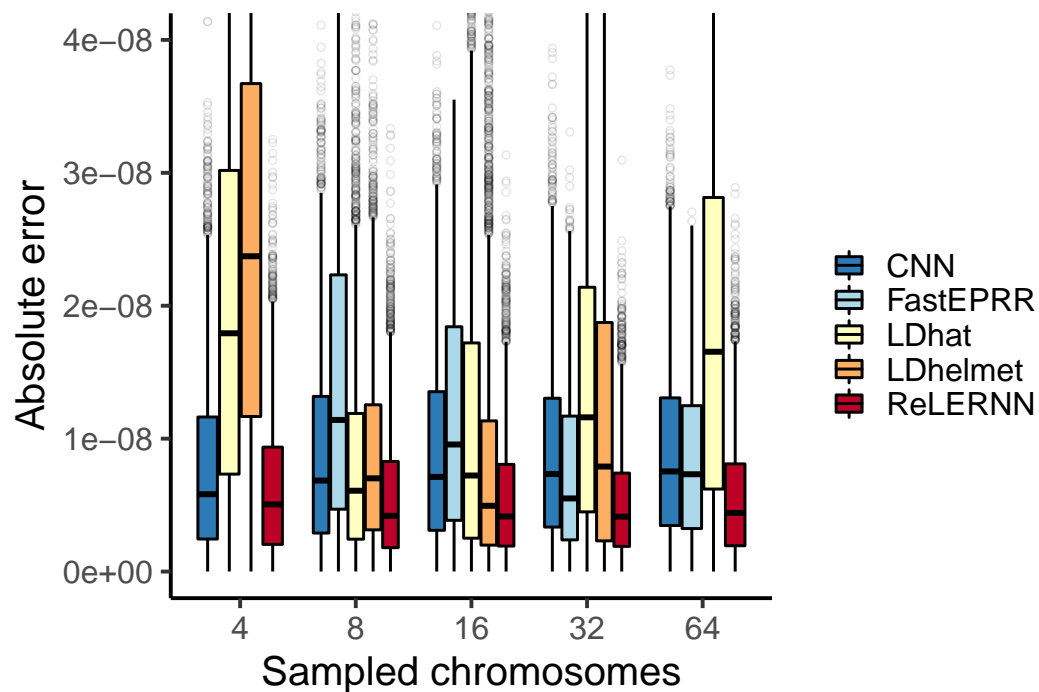

**Figure S15** Distribution of absolute error ( $|r_{\text{predicted}} - r_{\text{true}}|$ ) for each method across 5000 simulated chromosomes (1000 for FastEPRR). Independent simulations were run under a model of population size expansion (see methods). Sampled chromosomes indicate the number of independent sequences that were sampled from each msprime (Kelleher *et al.*, 2016) coalescent simulation. LDhelmet was not able to be used with  $n = 64$  chromosomes, and FastEPRR was not able to be used with  $n = 4$ .

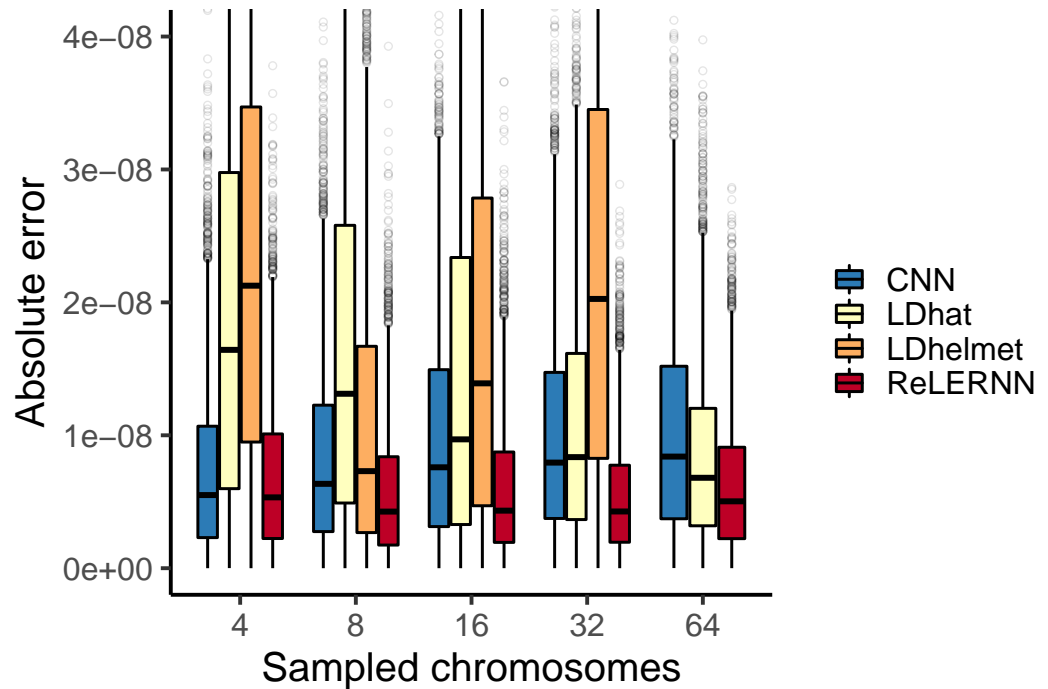

**Figure S16** Distribution of absolute error ( $|r_{predicted} - r_{true}|$ ) for each method across 5000 simulated chromosomes after model misspecification. For the CNN and ReLERNN, predictions were made by training on demographic simulations while testing on sequences simulated under equilibrium. For LDhat and LDhelmet, the lookup tables were generated using parameters values that were estimated from simulations where the model was misspecified in the same way as described for the CNN and ReLERNN above. Sampled chromosomes indicate the number of independent sequences that were sampled from each msprime (Kelleher *et al.*, 2016) coalescent simulation. LDhelmet was not able to be used with  $n = 64$  chromosomes and the demographic model could not be intentionally misspecified using FastEPRR.

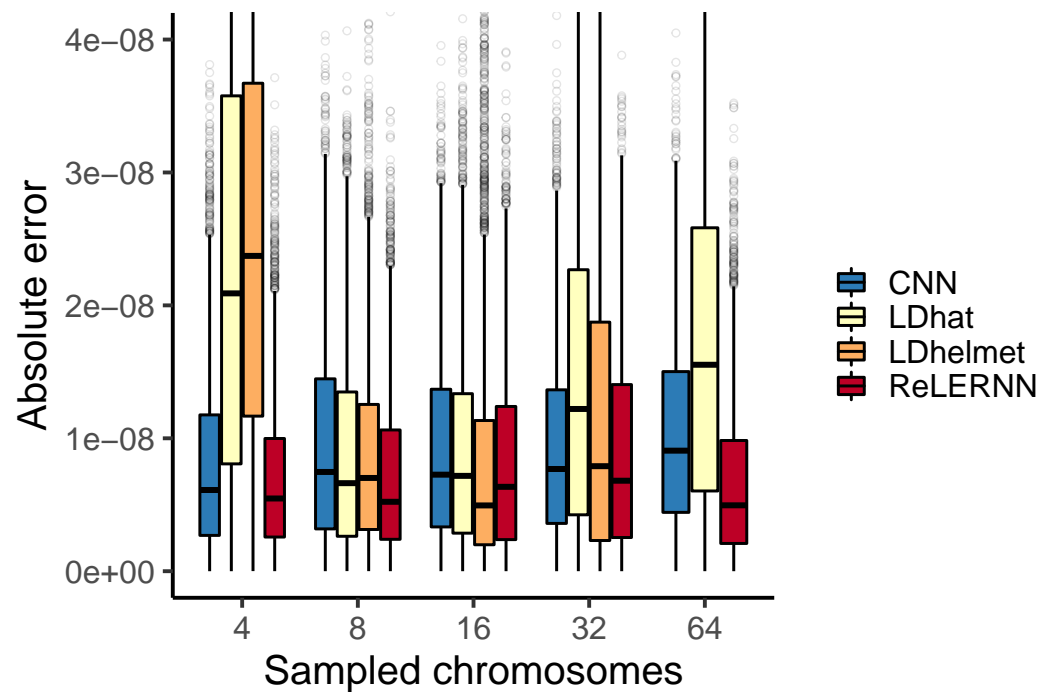

**Figure S17** Distribution of absolute error ( $|r_{predicted} - r_{true}|$ ) for each method across 5000 simulated chromosomes after model misspecification. For the CNN and ReLERNN, predictions were made by training on equilibrium simulations while testing on sequences simulated under a model of population size expansion. For LDhat and LDhelmet, the lookup tables were generated using parameters values that were estimated from simulations where the model was misspecified in the same way as described for the CNN and ReLERNN above. Sampled chromosomes indicate the number of independent sequences that were sampled from each msprime (Kelleher *et al.*, 2016) coalescent simulation. LDhelmet was not able to be used with  $n = 64$  chromosomes and the demographic model could not be intentionally misspecified using FastEPRR.

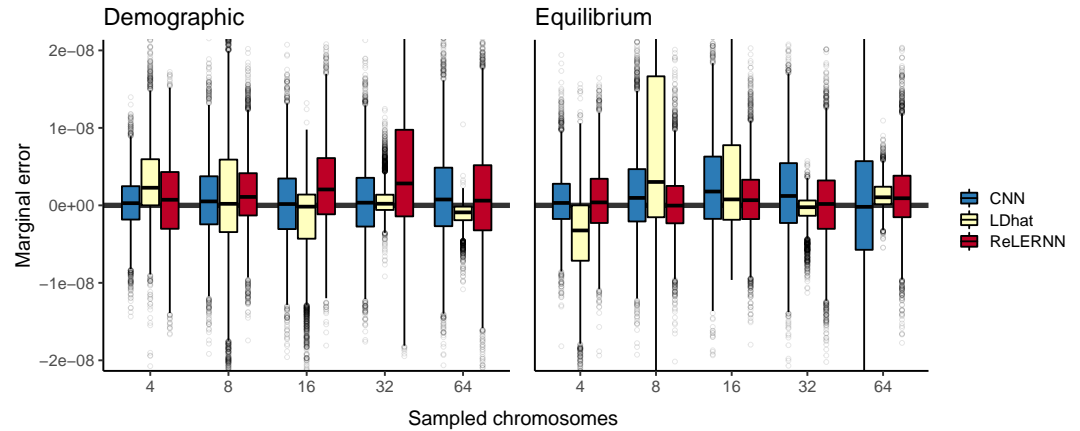

**Figure S18** Distribution of marginal error attributed to model misspecification across 5000 simulated chromosomes. Predictions were made by training on equilibrium simulations and testing on sequences simulated under a demographic model (**left**) or training on demographic simulations and testing on sequences simulated under equilibrium (**right**). Here, marginal error is represented as  $\epsilon_m - \epsilon_c$ , where  $\epsilon_m$  and  $\epsilon_c$  are equal to  $|r_{\text{predicted}} - r_{\text{true}}|$  when the model is misspecified and correctly specified, respectively. Sampled chromosomes indicate the number of independent sequences that were sampled from each msprime (*Kelleher et al., 2016*) coalescent simulation.

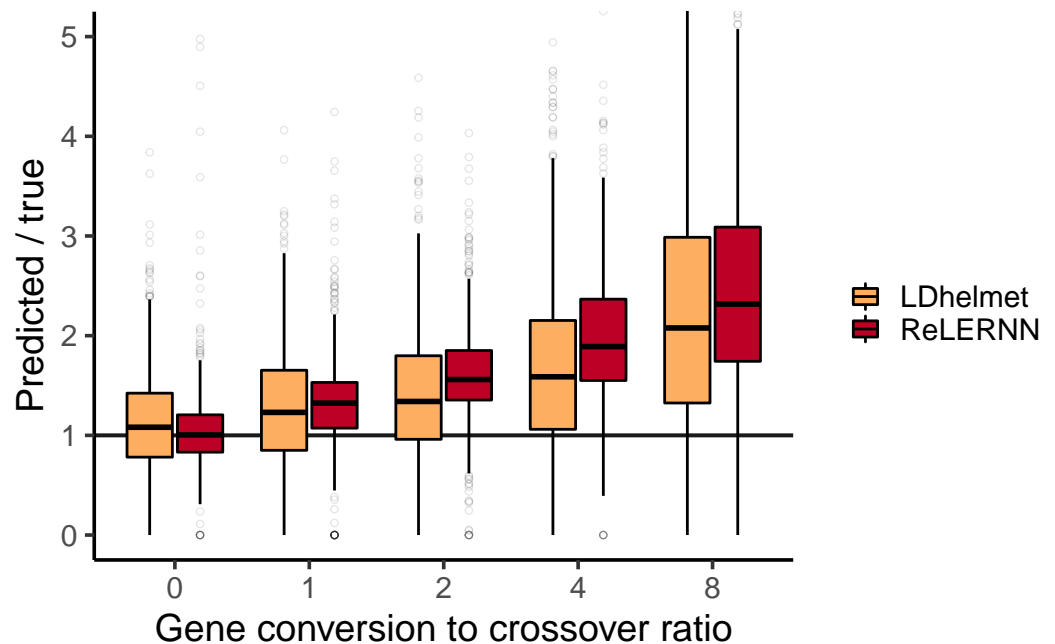

**Figure S19** Distribution of predicted rates of recombination over true rates for 5000 examples simulated with gene conversion and  $n = 8$ . The ratio of gene conversion to crossovers was drawn from  $U(0, \frac{r_{GC}}{r_{CO}})$ , with  $\frac{r_{GC}}{r_{CO}} \in \{0, 1, 2, 4, 8\}$ . Gene conversion tract lengths were fixed at 352 bp. All simulations were completed in ms (*Hudson, 2002*).



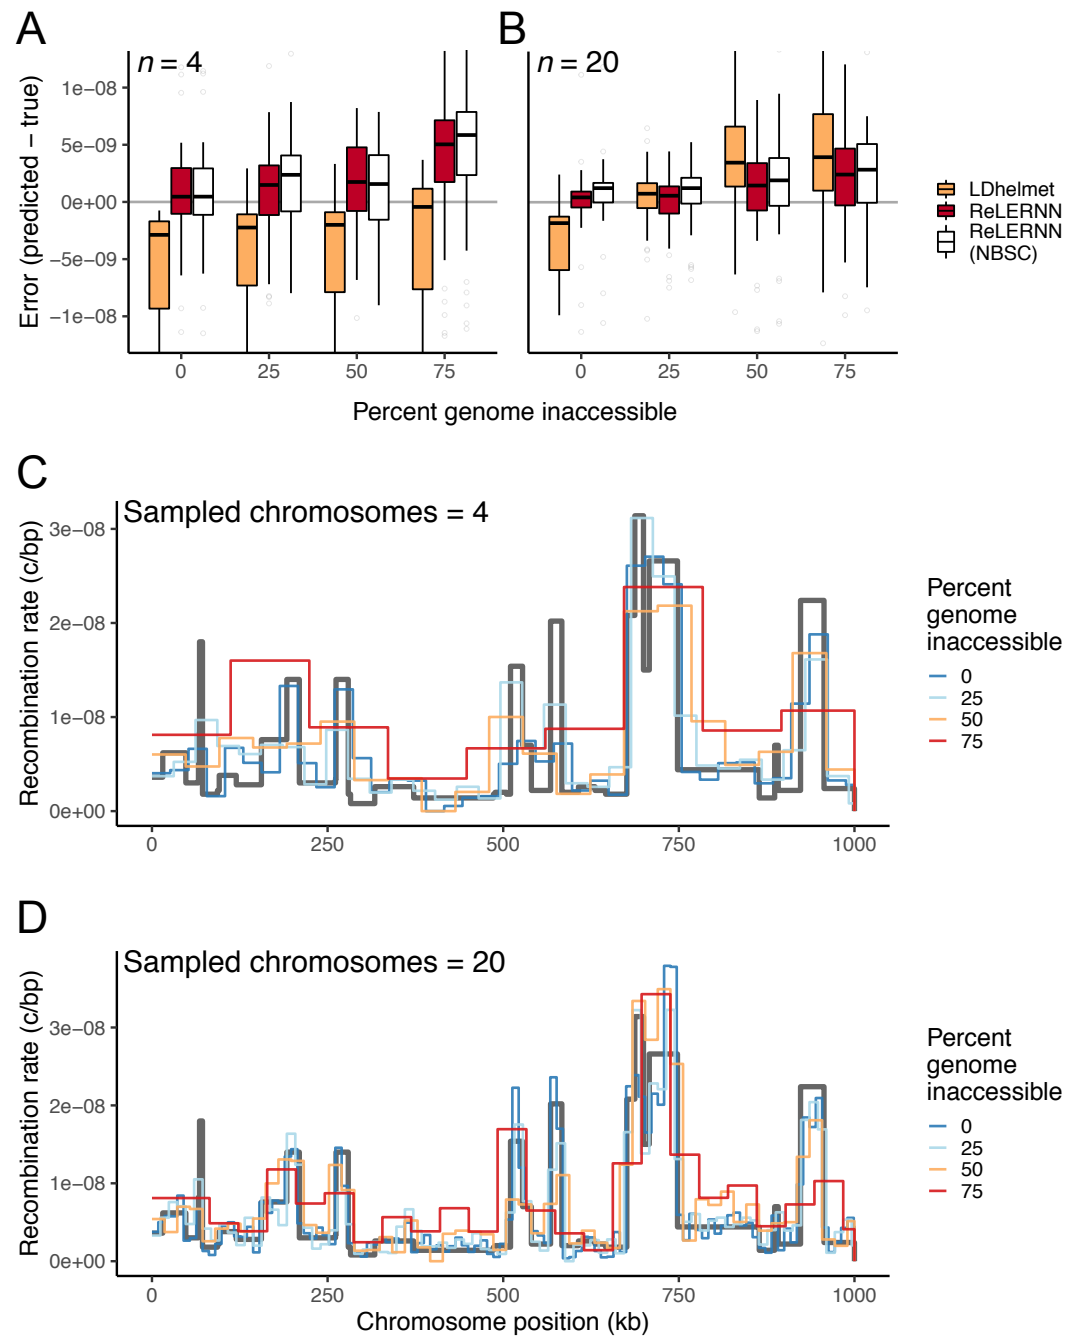

**Figure S20** (A) Distribution of raw error ( $r_{\text{predicted}} - r_{\text{true}}$ ) for LDhelmet (Chan et al., 2012) and ReLERNN when presented with varying levels of genome inaccessibility for simulations with  $n = 4$  and (B)  $n = 20$  chromosomes. (C) Fine-scale rate predictions generated by ReLERNN for a recombination landscape (grey line) simulated with varying levels of genome inaccessibility, for  $n = 4$  and (D)  $n = 20$  chromosomes.

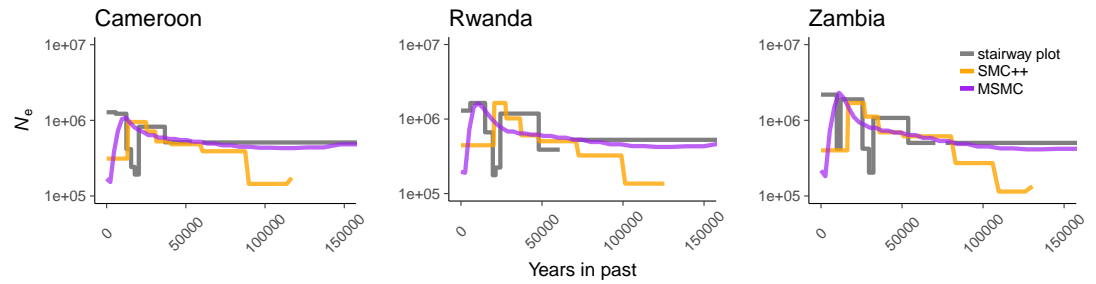

**Figure S21** Historical population size estimates were inferred for Cameroon, Rwanda, and Zambia using three separate methods, all of which disagree with one another. Inferences are based on 10 samples for both stairwayplot (grey line) and SMC++ (orange line), and 2 samples for MSMC (purple line).

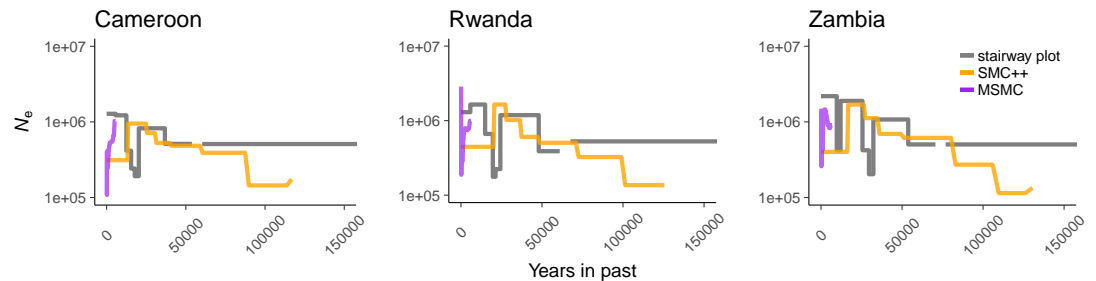

**Figure S22** Historical population size estimates were inferred for Cameroon, Rwanda, and Zambia using three separate methods. Here, inferences are based on 10 samples for both stairwayplot (grey line) and SMC++ (orange line), and 10 samples for MSMC (purple line).

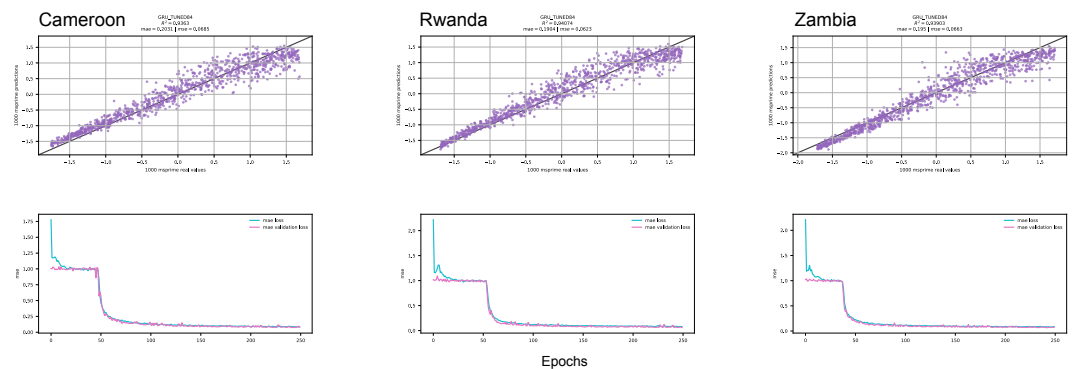

**Figure S23** ReLERNN test results for Cameroon, Rwanda, and Zambia when trained under assumptions of mutation-drift equilibrium. **(Top)** Scatter plot of raw (unnormalized) predictions for 1000 test examples using ReLERNN with the same parameters used in *Figure 2*. Mean absolute error and mean squared error are shown for each population. **(Bottom)** Line graph showing the convergence of loss (measured by mean squared error) over time (epochs) during training on the same data as above, for both the training set (blue lines) and the validation set (purple lines).

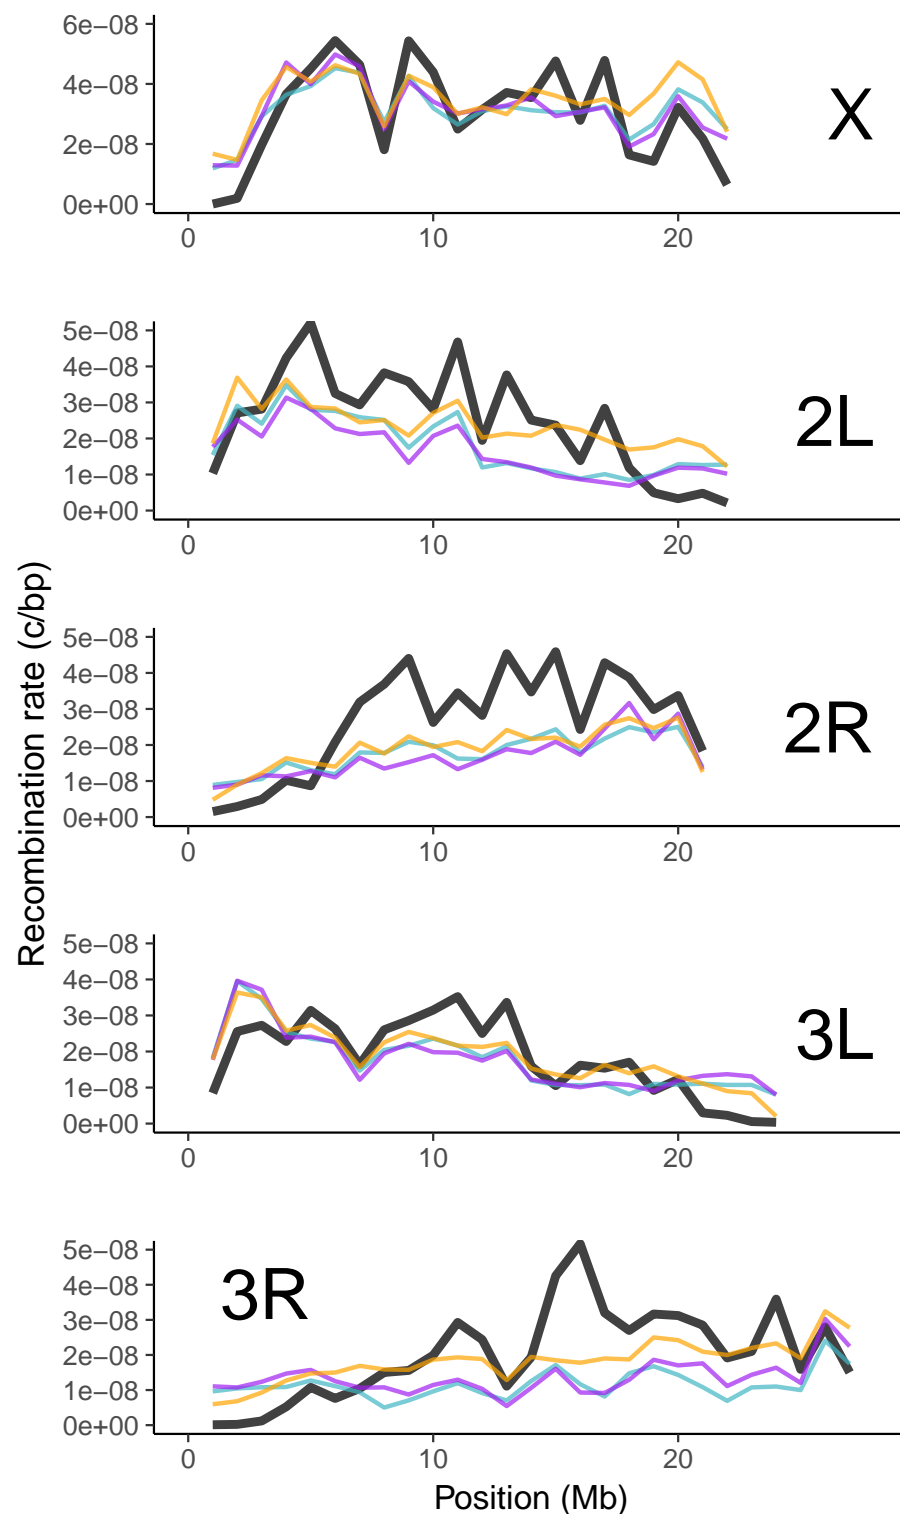

**Figure S24** Genome-wide recombination landscapes for *D. melanogaster* populations from Cameroon (teal lines), Rwanda (purple lines), and Zambia (orange lines). Rates are compared to those experimentally derived by *Cameron et al. (2012)* (black lines). All rates have been scaled to 1 Mb windows by using a weighted average (see Materials and Methods). Sample sizes ( $n = 10$ ) are the same for all populations.

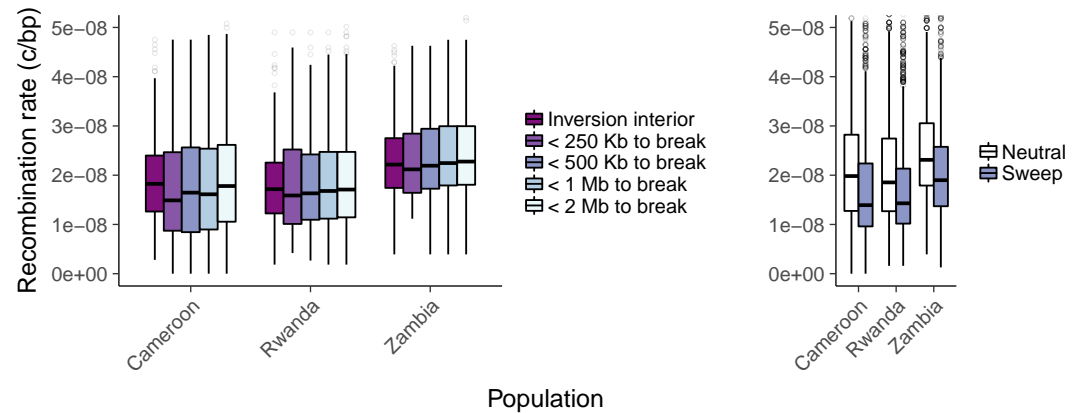

**Figure S25 (Left)** Recombination rate estimates for genomic windows  $> 2$  Mb inside,  $< 250$  kb surrounding,  $< 500$  kb surrounding,  $< 1$  Mb surrounding, and  $< 2$  Mb surrounding all inversion breakpoints. **(Right)** Recombination rate estimates for all genomic windows overlapping windows predicted as either hard/soft sweeps (purple) or as neutral (white) by diploS/HIC (*Kern and Schrider, 2018*).

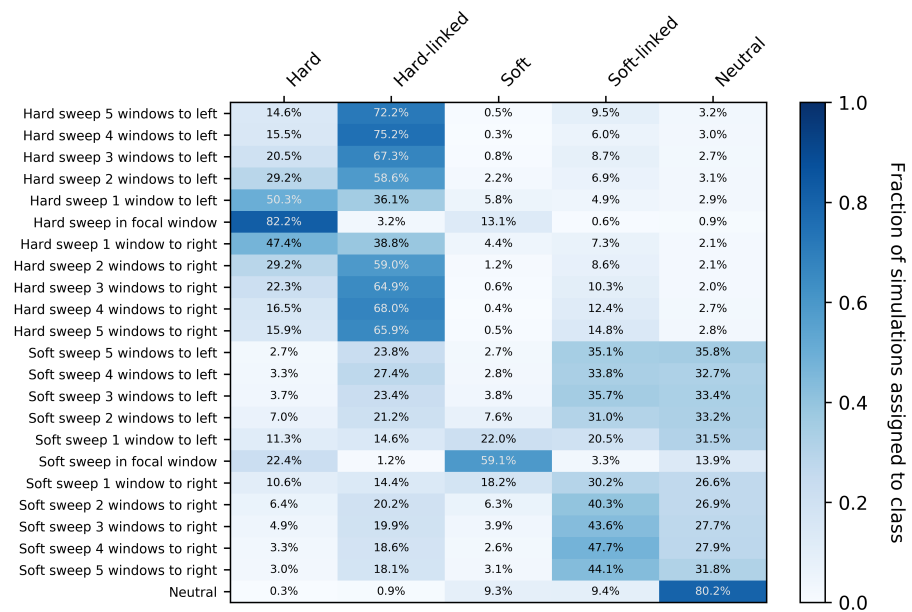

**Figure S26** Confusion matrix showing the fraction of test simulation windows assigned to each of five prediction categories by diploS/HIC (*Kern and Schrider, 2018*): hard, hard-linked, soft, soft-linked, and neutral. The y-axis shows the location of the window being classified relative to the selected window.

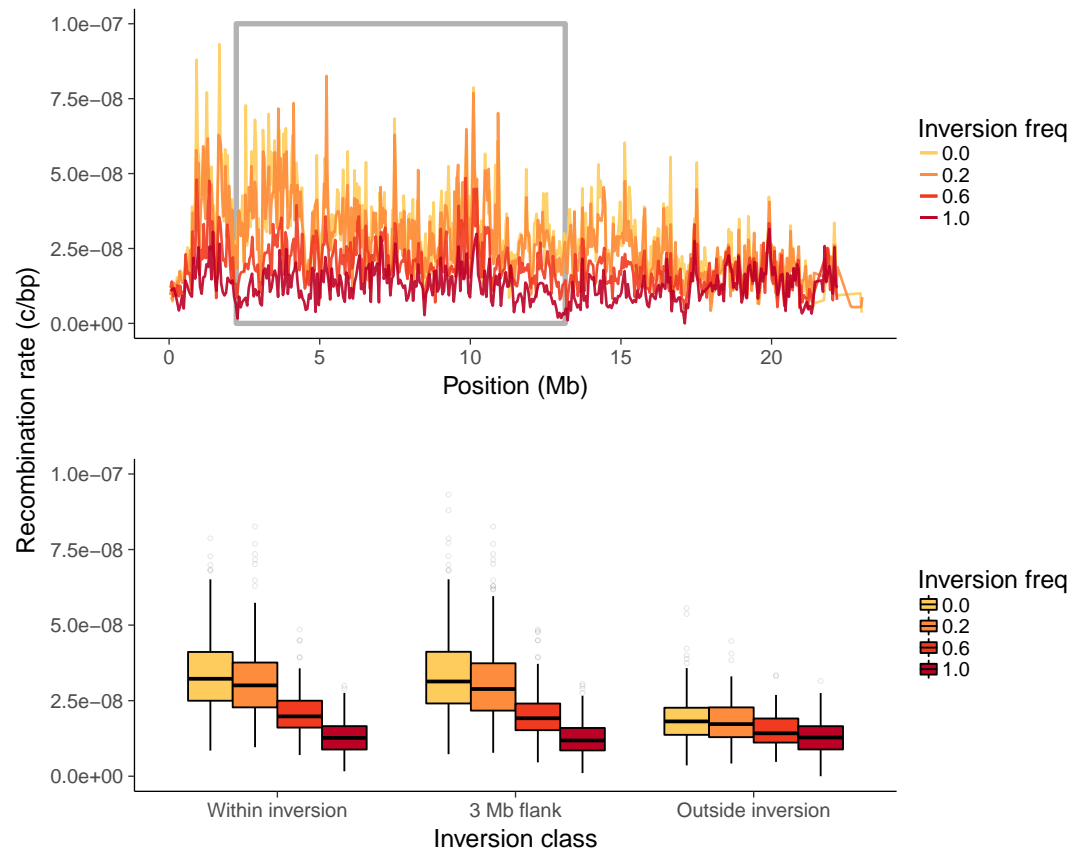

**Figure S27 (Top)** Recombination landscapes for Zambian *D. melanogaster* surrounding *In(2L)t*, sampled at different inversion frequencies. The grey box denotes the inversion boundaries of *In(2L)t* in *Drosophila* (Corbett-Detig and Hartl, 2012). **(Bottom)** Recombination rate estimates from genomic windows within the inversion, within a 3 Mb region flanking the inversion, and 3 Mb outside the inversion, sampled at different inversion frequencies.

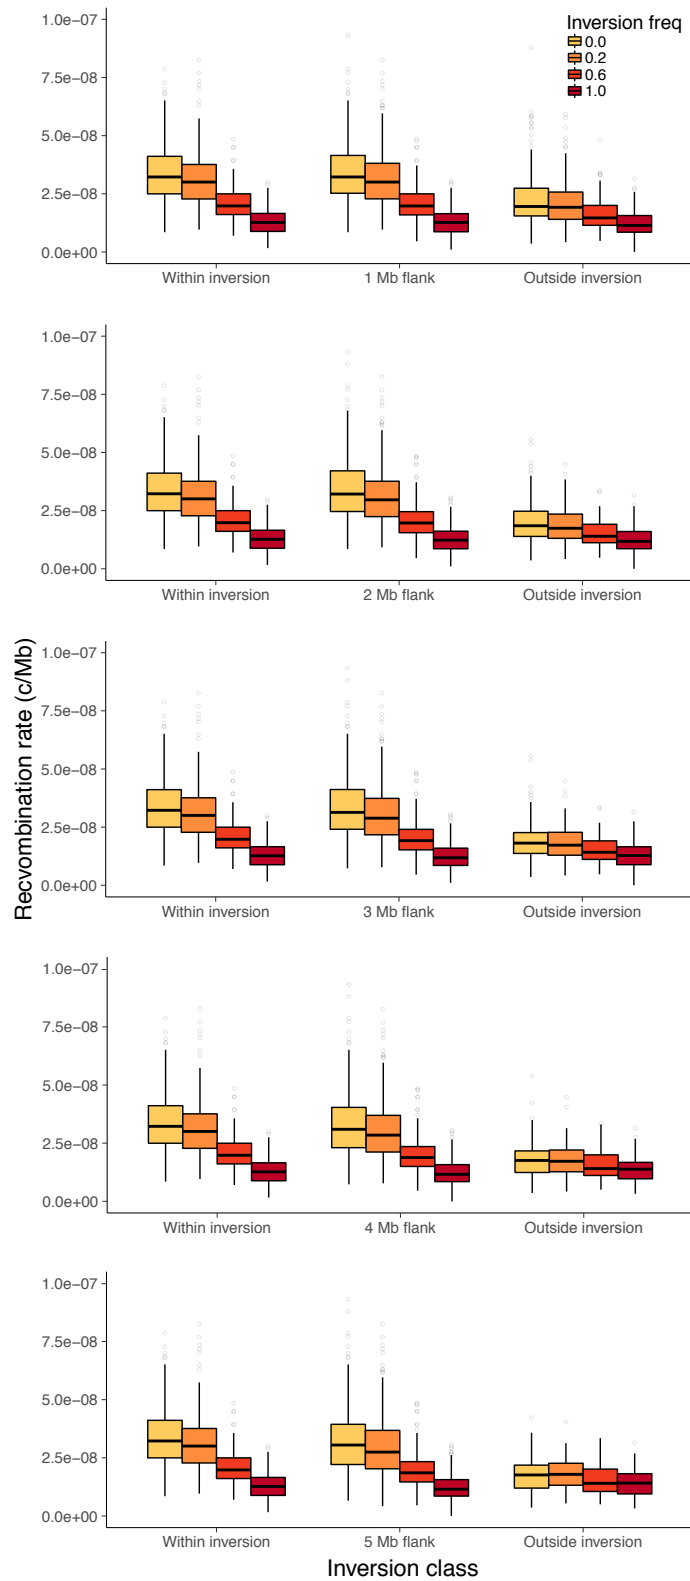

**Figure S28** Recombination rate estimates using flanking window sizes from 1-5 Mb. Rates are shown for genomic windows within the inversion, within regions flanking the inversion, and for regions outside both the inversion and flanking regions. All estimates are from chromosome 2L with *In(2L)t* sampled at different inversion frequencies
